# Supplementary material for: Gene Expression Profiling of Colorectal Tumors and Normal Mucosa by Microarrays Meta-Analysis Using Prediction Analysis of Microarray, Artificial Neural Network, Classification, and Regression Trees
Source: Hindawi journal article supplement (doi:10.1155/2014/634123), 2014-01-01
Supplement: f1 [file 634123.f1.pdf]

Supplementary materials.

Table 1 The Settings of ANN,CART, C5.0 and PAM methods

|                      | <b>ANN</b>                        | <b>C5.0</b>                                   | <b>CART</b>                                | <b>PAM</b>                                                                                                   |
|----------------------|-----------------------------------|-----------------------------------------------|--------------------------------------------|--------------------------------------------------------------------------------------------------------------|
| <b>Setting items</b> | Method: Quick backpropagation     | Use partitioned data: True                    | Use partitioned data: True                 | Threshold: The candidate genes were with the minimum classification errors, which number was lower than 100. |
|                      | Prevent overtraining: 80% Samples | Output type:<br>Decision tree<br>Use boosting | Build: Model                               |                                                                                                              |
|                      | Set random seed-Seed:720925       | Mode: Expert                                  | Maximum tree depth-<br>Levels below root:7 |                                                                                                              |
|                      | Stop on: Default                  | Pruning severity:0                            |                                            |                                                                                                              |
|                      | Optimize: Speed                   | Minimum records per child<br>branch:2         |                                            |                                                                                                              |
|                      |                                   | Use global pruning: True                      |                                            |                                                                                                              |
|                      |                                   | Winnow attributes: True                       |                                            |                                                                                                              |

Table 2 The settings of the Gene Set Enrichment Analysis method

| <b>Items</b>                            | <b>Settings</b> |
|-----------------------------------------|-----------------|
| <b>Number of permutations</b>           | 1000            |
| <b>Collapse dataset to gene symbols</b> | False           |
| <b>Permutation type</b>                 | phenotype       |
| <b>Enrichment statistic</b>             | weighted        |
| <b>Metric of ranking genes</b>          | Signal2Noise    |
| <b>Max size</b>                         | 500             |
| <b>Min size</b>                         | 15              |

Footnote 1: The gene sets of reference for Gene Set Enrichment Analysis (GSEA) are derived from MSigDB (figure shown in the below). In the present study, C1 positional gene sets (C1\_ALL), C2:canonical pathways (C2\_CP), genemapp (C2\_genmapp), kegg (C2\_kegg), C5:GO biological process (C5\_BP), GO cellular component (C5\_CC), and GO molecular function (C5\_MF) were selected. The definitions of significant gene sets analyzed by GSEA method were 1) NOM p-val<0.05 and 2) Familywise-error rate (FWER)<0.25. NOM p-val is the statistical significance of the enrichment score. The nominal p value is not adjusted for gene set size or multiple hypothesis testing; therefore, it is of limited use in comparing gene sets. FWER is a more conservatively estimated probability that the normalized enrichment score represents a false positive finding.

- ▶ **C1** (positional gene sets, 386 gene sets) 
  - ▶ by chromosome: 1 2 3 4 5 6 7 8 9 10 11 12 13 14 15 16 17 18 19 20 21 22 X Y
- ▶ **C2** (curated gene sets, 1892 gene sets) 
  - ▶ **CGP** (chemical and genetic perturbations, 1186 gene sets) 
  - ▶ **CP** (canonical pathways, 639 gene sets) 
- ▶ **C3** (motif gene sets, 837 gene sets) 
  - ▶ **MIR** (microRNA targets, 222 gene sets) 
  - ▶ **TFT** (transcription factor targets, 500 gene sets) 
- ▶ **C4** (computational gene sets, 883 gene sets) 
  - ▶ **CGN** (cancer gene neighborhoods, 427 gene sets) 
  - ▶ **CM** (cancer modules, 456 gene sets) 
- ▶ **C5** (GO gene sets, 1454 gene sets) 
  - ▶ **BP** (GO biological process, 825 gene sets) 
  - ▶ **CC** (GO cellular component, 233 gene sets) 
  - ▶ **MF** (GO molecular function, 396 gene sets) 

Footnote 2: The detailed ordering methods of gene importance were as follows.

ANN

The ANN model listed the relative importance values (RI) of the input gene variables in the classification of colorectal tumors and normal mucosal tissues, with larger values representing higher contribution levels. The relative importance values were ranked with 1 point for the lowest value, 2 points for the next lowest value and so on. Identical ranked scores (RS) was given to the genes with the same RI value. Finally, each gene's RS was divided by the highest RS in order to obtain the percentile ranked score (RS%)

## **CART**

The gene importance ordering method in the CART model was used to calculate the number of times each gene was selected as a node in the decision tree in the analysis with 1,000 repeated samplings. A higher number of times selected indicated a higher importance for the gene. The genes were ranked based on the number of times they were selected as a significant gene, with 1 point for the lowest number of times, 2 points for the next lowest number of times and so on.

The same ranked score (RS) was given to the genes with the same Sig value. Finally, the RS of each gene was divided by the highest RS to obtain the RS%.

## **PAM**

One of the PAM gene importance calculation methods is similar to CART. However, in addition to using Sig to calculate importance, PAM used the centroids values (Cen) to calculate gene importance. The detailed calculation method using Cen was as follows. The absolute values were obtained for the averages of the centroids from the PAM analysis results after taking 1,000 repeated samples for the four group pairs (ad/nm, ac/nm, cn/nm and mt/nm). Next, the sum of

the absolute values for each gene was ranked, with 1 point for the lowest value, 2 points for the next lowest value and so on. The same RS was given to identical the centroids values. Finally, the RS of each gene was divided by the highest RS to obtain the RS%.

## **C5.0**

The calculation method based on the number of times each gene being selected, similar to CART, as well as node location. The latter method was that when a gene, as a node, is closer to the root of a decision tree (that is, the first split point), it has a higher RS, while it has a lower RS when it is closer to the tip of the branches and so on. The RS% calculation method is the same as that of CART. The ranked scores were converted to percentiles in order to make it possible to compare the order of gene importance obtained from these four analysis methods.

Table 3 Gene ordering of 55 significant genes via ANN, CART, C50, and PAM methods for the classification of colorectal tumors and normal mucosa tissues

| Gene symbol | ANN# |    |      | CART $\Delta$ |    |      | C5.0 $\Delta$ |    |      | C5.0_importance |    |     | PAM $\Delta$ |    |      | PAM_centroid |    |      | Sum of RS%<br>(max=6,min=0) | CV   |
|-------------|------|----|------|---------------|----|------|---------------|----|------|-----------------|----|-----|--------------|----|------|--------------|----|------|-----------------------------|------|
|             | RI   | RS | RS%  | Sig           | RS | RS%  | Sig           | RS | RS%  | Node            | RS | RS% | Sig          | RS | RS%  | Cen          | RS | RS%  |                             |      |
| CA7         | 5.4  | 26 | 0.79 | 360           | 18 | 0.95 | 307           | 43 | 1.00 | 1.1             | 28 | 1.0 | 100          | 13 | 1.00 | 14.00        | 13 | 1.00 | 5.74                        | 0.09 |
| SPIB        | 3.2  | 19 | 0.58 | 412           | 19 | 1.00 | 220           | 39 | 0.91 | 1.3             | 27 | 1.0 | 74           | 7  | 0.54 | 7.54         | 7  | 0.54 | 4.52                        | 0.30 |
| GUCA2B      | 1.8  | 9  | 0.27 | 1             | 1  | 0.05 | 73            | 25 | 0.58 | 2.6             | 20 | 0.7 | 100          | 13 | 1.00 | 14.00        | 13 | 1.00 | 3.62                        | 0.64 |
| AQP8        | 2.6  | 15 | 0.45 | 0             | 0  | 0    | 74            | 26 | 0.60 | 2.8             | 17 | 0.6 | 95           | 12 | 0.92 | 12.92        | 12 | 0.92 | 3.51                        | 0.59 |
| IL6R        | 8.1  | 30 | 0.91 | 124           | 14 | 0.74 | 256           | 41 | 0.95 | 1.8             | 25 | 0.9 | 0            | 0  | 0    | 0            | 0  | 0    | 3.49                        | 0.78 |
| SPP1        | 17.9 | 33 | 1.00 | 185           | 17 | 0.89 | 234           | 40 | 0.93 | 2.9             | 16 | 0.6 | 0            | 0  | 0    | 0            | 0  | 0    | 3.40                        | 0.82 |
| TCN1        | 7.3  | 29 | 0.88 | 174           | 15 | 0.79 | 279           | 42 | 0.98 | 2.7             | 19 | 0.7 | 0            | 0  | 0    | 0            | 0  | 0    | 3.32                        | 0.79 |
| CWH43       | 9.4  | 31 | 0.94 | 52            | 13 | 0.68 | 141           | 36 | 0.84 | 2.7             | 19 | 0.7 | 0            | 0  | 0    | 0            | 0  | 0    | 3.14                        | 0.80 |
| SST         | 2.1  | 12 | 0.36 | 1             | 1  | 0.05 | 80            | 28 | 0.65 | 2.8             | 18 | 0.6 | 76           | 8  | 0.62 | 8.62         | 8  | 0.62 | 2.94                        | 0.49 |
| KIAA1199    | 7.3  | 29 | 0.88 | 13            | 8  | 0.42 | 118           | 33 | 0.77 | 2.6             | 20 | 0.7 | 0            | 0  | 0    | 0            | 0  | 0    | 2.78                        | 0.84 |
| SLC4A4      | 1.8  | 9  | 0.27 | 3             | 3  | 0.16 | 34            | 18 | 0.42 | 3.1             | 14 | 0.5 | 79           | 9  | 0.69 | 9.69         | 9  | 0.69 | 2.73                        | 0.48 |
| CHP2        | 1.1  | 2  | 0.06 | 181           | 16 | 0.84 | 143           | 37 | 0.86 | 1.3             | 27 | 1.0 | 0            | 0  | 0    | 0            | 0  | 0    | 2.73                        | 1.05 |
| GCG         | 3.2  | 19 | 0.58 | 0             | 0  | 0    | 15            | 11 | 0.26 | 3.7             | 9  | 0.3 | 82           | 10 | 0.77 | 10.77        | 10 | 0.77 | 2.69                        | 0.69 |
| NR3C2       | 2.9  | 17 | 0.52 | 37            | 11 | 0.58 | 113           | 32 | 0.74 | 2.2             | 23 | 0.8 | 0            | 0  | 0    | 0            | 0  | 0    | 2.66                        | 0.81 |
| NFE2L3      | 3.0  | 18 | 0.55 | 39            | 12 | 0.63 | 208           | 38 | 0.88 | 3.0             | 15 | 0.5 | 0            | 0  | 0    | 0            | 0  | 0    | 2.60                        | 0.83 |
| CLDN1       | 11.9 | 32 | 0.97 | 9             | 7  | 0.37 | 103           | 30 | 0.70 | 3.2             | 13 | 0.5 | 0            | 0  | 0    | 0            | 0  | 0    | 2.50                        | 0.92 |
| C9orf125    | 6.2  | 28 | 0.85 | 7             | 6  | 0.32 | 139           | 35 | 0.81 | 3.1             | 14 | 0.5 | 0            | 0  | 0    | 0            | 0  | 0    | 2.48                        | 0.91 |
| CPM         | 4.0  | 22 | 0.67 | 6             | 5  | 0.26 | 81            | 29 | 0.67 | 2.4             | 22 | 0.8 | 0            | 0  | 0    | 0            | 0  | 0    | 2.39                        | 0.89 |
| CLDN8       | 1.5  | 6  | 0.18 | 0             | 0  | 0    | 22            | 14 | 0.33 | 4.1             | 5  | 0.2 | 90           | 11 | 0.85 | 11.85        | 11 | 0.85 | 2.38                        | 0.92 |
| MMP7        | 5.0  | 24 | 0.73 | 33            | 10 | 0.53 | 76            | 27 | 0.63 | 3.3             | 12 | 0.4 | 0            | 0  | 0    | 0            | 0  | 0    | 2.31                        | 0.82 |
| EDN3        | 3.7  | 21 | 0.64 | 4             | 4  | 0.21 | 53            | 22 | 0.51 | 2.0             | 24 | 0.9 | 0            | 0  | 0    | 0            | 0  | 0    | 2.22                        | 0.96 |
| GUCA2A      | 1.2  | 3  | 0.09 | 15            | 9  | 0.47 | 66            | 24 | 0.56 | 1.7             | 26 | 0.9 | 1            | 1  | 0.08 | 1.08         | 1  | 0.08 | 2.21                        | 0.95 |
| CDH3        | 5.6  | 27 | 0.82 | 1             | 1  | 0.05 | 76            | 27 | 0.63 | 3.1             | 14 | 0.5 | 0            | 0  | 0    | 0            | 0  | 0    | 2.00                        | 1.08 |
| FAM55D      | 2.0  | 11 | 0.33 | 15            | 9  | 0.47 | 39            | 20 | 0.47 | 2.6             | 20 | 0.7 | 0            | 0  | 0    | 0            | 0  | 0    | 1.99                        | 0.86 |
| NR3C1       | 1.7  | 8  | 0.24 | 15            | 9  | 0.47 | 106           | 31 | 0.72 | 3.4             | 11 | 0.4 | 0            | 0  | 0    | 0            | 0  | 0    | 1.83                        | 0.93 |
| PYY         | 2.9  | 17 | 0.52 | 0             | 0  | 0    | 14            | 10 | 0.23 | 3.9             | 7  | 0.3 | 15           | 5  | 0.38 | 5.38         | 5  | 0.38 | 1.77                        | 0.60 |
| SLC30A10    | 3.7  | 21 | 0.64 | 4             | 4  | 0.21 | 10            | 6  | 0.14 | 4.2             | 4  | 0.1 | 9            | 4  | 0.31 | 4.31         | 4  | 0.31 | 1.74                        | 0.64 |
| BEST2       | 1.7  | 8  | 0.24 | 0             | 0  | 0    | 132           | 34 | 0.79 | 3.4             | 11 | 0.4 | 2            | 2  | 0.15 | 2.15         | 2  | 0.15 | 1.73                        | 0.96 |
| CLCA1       | 2.8  | 16 | 0.48 | 15            | 9  | 0.47 | 43            | 21 | 0.49 | 3.9             | 7  | 0.3 | 0            | 0  | 0    | 0            | 0  | 0    | 1.70                        | 0.84 |
| TRPM6       | 1.6  | 7  | 0.21 | 0             | 0  | 0    | 62            | 23 | 0.53 | 2.4             | 22 | 0.8 | 1            | 1  | 0.08 | 1.08         | 1  | 0.08 | 1.69                        | 1.11 |
| SCNN1B      | 2.5  | 14 | 0.42 | 2             | 2  | 0.11 | 23            | 15 | 0.35 | 3.9             | 7  | 0.3 | 6            | 3  | 0.23 | 3.23         | 3  | 0.23 | 1.59                        | 0.42 |
| THRB        | 5.6  | 27 | 0.82 | 0             | 0  | 0    | 33            | 17 | 0.40 | 3.7             | 9  | 0.3 | 0            | 0  | 0    | 0            | 0  | 0    | 1.53                        | 1.28 |
| ABCG2       | 1.3  | 4  | 0.12 | 0             | 0  | 0    | 34            | 18 | 0.42 | 4.6             | 2  | 0.1 | 43           | 6  | 0.46 | 6.46         | 6  | 0.46 | 1.53                        | 0.84 |
| SPINK5      | 2.4  | 13 | 0.39 | 1             | 1  | 0.05 | 66            | 24 | 0.56 | 3.2             | 13 | 0.5 | 0            | 0  | 0    | 0            | 0  | 0    | 1.47                        | 1.04 |
| GALNT6      | 5.2  | 25 | 0.76 | 0             | 0  | 0    | 21            | 13 | 0.30 | 3.6             | 10 | 0.4 | 0            | 0  | 0    | 0            | 0  | 0    | 1.42                        | 1.28 |
| CHST5       | 1.4  | 5  | 0.15 | 0             | 0  | 0    | 36            | 19 | 0.44 | 2.5             | 21 | 0.8 | 0            | 0  | 0    | 0            | 0  | 0    | 1.34                        | 1.38 |

| Gene symbol | ANN# |    |      | CART $\Delta$ |    |      | C5.0 $\Delta$ |    |      | C5.0_importance |    |     | PAM $\Delta$ |    |     | PAM_centroid |    |     | Sum of RS%<br>(max=6,min=0) | CV   |
|-------------|------|----|------|---------------|----|------|---------------|----|------|-----------------|----|-----|--------------|----|-----|--------------|----|-----|-----------------------------|------|
|             | RI   | RS | RS%  | Sig           | RS | RS%  | Sig           | RS | RS%  | Node            | RS | RS% | Sig          | RS | RS% | Cen          | RS | RS% |                             |      |
| NUP153      | 4.4  | 23 | 0.70 | 0             | 0  | 0    | 20            | 12 | 0.28 | 3.8             | 8  | 0.3 | 0            | 0  | 0   | 0            | 0  | 0   | 1.26                        | 1.31 |
| DEFA6       | 3.5  | 20 | 0.61 | 0             | 0  | 0    | 12            | 8  | 0.19 | 4.0             | 6  | 0.2 | 0            | 0  | 0   | 0            | 0  | 0   | 1.01                        | 1.41 |
| SLC7A5      | 4.4  | 23 | 0.70 | 0             | 0  | 0    | 5             | 3  | 0.07 | 4.0             | 6  | 0.2 | 0            | 0  | 0   | 0            | 0  | 0   | 0.98                        | 1.68 |
| ZG16        | 1.3  | 4  | 0.12 | 0             | 0  | 0    | 5             | 3  | 0.07 | 2.4             | 22 | 0.8 | 0            | 0  | 0   | 0            | 0  | 0   | 0.98                        | 1.90 |
| C6orf105    | 1.9  | 10 | 0.30 | 0             | 0  | 0    | 25            | 16 | 0.37 | 3.9             | 7  | 0.3 | 0            | 0  | 0   | 0            | 0  | 0   | 0.93                        | 1.12 |
| HP          | 3.7  | 21 | 0.64 | 0             | 0  | 0    | 10            | 6  | 0.14 | 4.4             | 3  | 0.1 | 0            | 0  | 0   | 0            | 0  | 0   | 0.88                        | 1.68 |
| MUC2        | 1.4  | 5  | 0.15 | 2             | 2  | 0.11 | 13            | 9  | 0.21 | 3.6             | 10 | 0.4 | 0            | 0  | 0   | 0            | 0  | 0   | 0.82                        | 0.99 |
| KLK11       | 2.4  | 13 | 0.39 | 0             | 0  | 0    | 5             | 3  | 0.07 | 3.6             | 10 | 0.4 | 0            | 0  | 0   | 0            | 0  | 0   | 0.82                        | 1.37 |
| AHCYL2      | 1.4  | 5  | 0.15 | 0             | 0  | 0    | 14            | 10 | 0.23 | 3.3             | 12 | 0.4 | 0            | 0  | 0   | 0            | 0  | 0   | 0.81                        | 1.28 |
| CA1         | 1.6  | 7  | 0.21 | 0             | 0  | 0    | 9             | 5  | 0.12 | 3.3             | 12 | 0.4 | 0            | 0  | 0   | 0            | 0  | 0   | 0.76                        | 1.36 |
| H3F3A       | 1.5  | 6  | 0.18 | 0             | 0  | 0    | 12            | 8  | 0.19 | 3.8             | 8  | 0.3 | 0            | 0  | 0   | 0            | 0  | 0   | 0.65                        | 1.15 |
| CLCA4       | 2.1  | 12 | 0.36 | 0             | 0  | 0    | 3             | 2  | 0.05 | 4.0             | 6  | 0.2 | 0            | 0  | 0   | 0            | 0  | 0   | 0.62                        | 1.46 |
| BTNL3       | 1.5  | 6  | 0.18 | 0             | 0  | 0    | 11            | 7  | 0.16 | 4.1             | 5  | 0.2 | 0            | 0  | 0   | 0            | 0  | 0   | 0.52                        | 1.10 |
| FCGBP       | 1.3  | 4  | 0.12 | 0             | 0  | 0    | 12            | 8  | 0.19 | 4.0             | 6  | 0.2 | 0            | 0  | 0   | 0            | 0  | 0   | 0.52                        | 1.15 |
| MS4A12      | 1.4  | 5  | 0.15 | 2             | 2  | 0.11 | 2             | 1  | 0.02 | 4.0             | 6  | 0.2 | 0            | 0  | 0   | 0            | 0  | 0   | 0.49                        | 1.08 |
| CA4         | 1.5  | 6  | 0.18 | 0             | 0  | 0    | 7             | 4  | 0.09 | 4.1             | 5  | 0.2 | 0            | 0  | 0   | 0            | 0  | 0   | 0.45                        | 1.17 |
| CD177       | 1.3  | 4  | 0.12 | 0             | 0  | 0    | 3             | 2  | 0.05 | 4.0             | 6  | 0.2 | 0            | 0  | 0   | 0            | 0  | 0   | 0.38                        | 1.38 |
| SLC26A3     | 1.0  | 1  | 0.03 | 0             | 0  | 0    | 10            | 6  | 0.14 | 4.2             | 4  | 0.1 | 0            | 0  | 0   | 0            | 0  | 0   | 0.31                        | 1.34 |
| MT1M        | 1.6  | 7  | 0.21 | 0             | 0  | 0    | 2             | 1  | 0.02 | 5.5             | 1  | 0.0 | 0            | 0  | 0   | 0            | 0  | 0   | 0.27                        | 1.84 |

Relative importance (RI) : the sum of relative importance values in 1,000 bootstrapping rounds ; Ranked score (RS) : the ranked score of each gene ; The percentile ranked score (RS%) ; Sig: the times of a gene selected as a significant genes in 1,000 bootstrapping rounds; Node : the average location of a gene selected as a node in its decision tree in 1,000 bootstrapping rounds ; Centroid (Cen) : the sum of absolute values of centroids for a gene in 1,000 bootstrapping rounds. The higher RS% represents that the gene was more important for the classification of colorectal tumors and normal mucosa tissues. CV stands for coefficient of variance. The RS% of each gene in different methods were calculated by four approaches noted with the suffix,  $\Delta$ , importance, centroid and #. Each symbol represents the way to calculate RS%.  $\Delta$ : the significant times of each gene in 1,000 bootstrapping rounds. Importance:The node location of genes in decision trees. Centroid: centroid values of each gene in PAM. #: the relative importance values in ANN.

**Table 4 The model performance and the numbers of selected genes of the primary screening of significant genes via PAM in 100 bootstrapping rounds**

|                                       | ad/nm |     | ac/nm |     | cn/nm |     | mt/nm |     |
|---------------------------------------|-------|-----|-------|-----|-------|-----|-------|-----|
|                                       | Mn    | Sd  | Mn    | Sd  | Mn    | Sd  | Mn    | Sd  |
| Model accuracy(%)                     | 100.0 | 1.6 | 98.6  | 0.2 | 95.4  | 0.5 | 99.4  | 0.3 |
| Test accuracy(%)                      | 99.4  | 0   | 98.1  | 1.2 | 95.1  | 1.4 | 98.8  | 1.9 |
| The average numbers of genes selected | 3.9   | 1.5 | 6.5   | 2.6 | 9.7   | 2.2 | 7.4   | 4.8 |



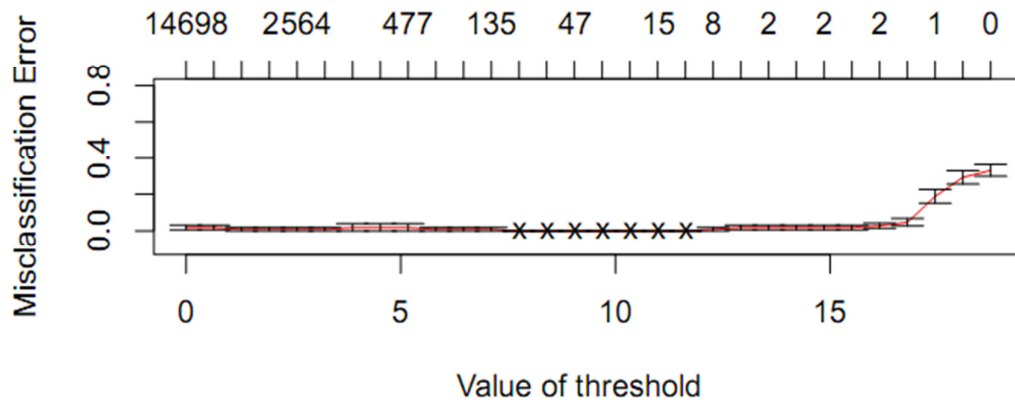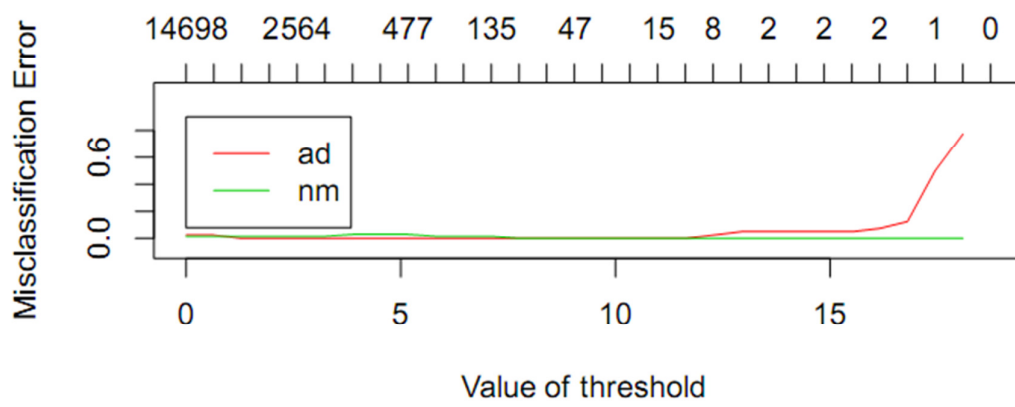

(a)

### Number of genes

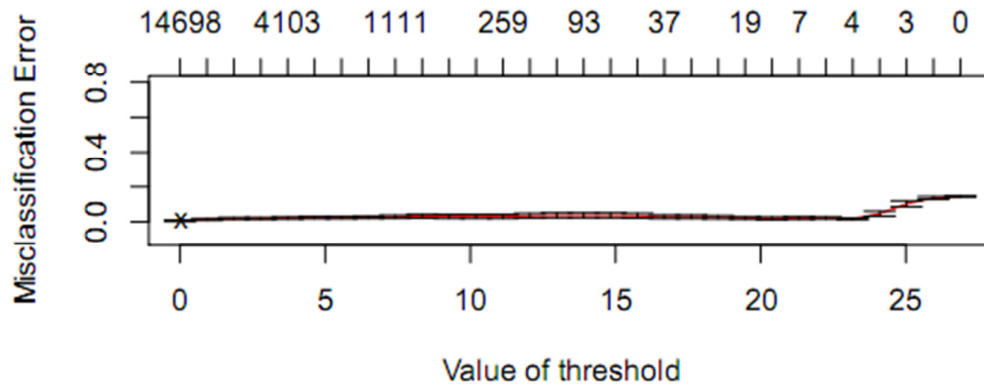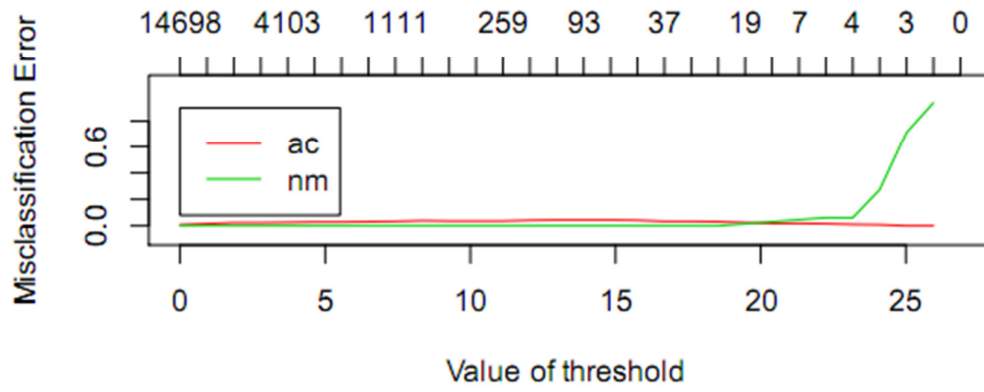

(b)

### Number of genes

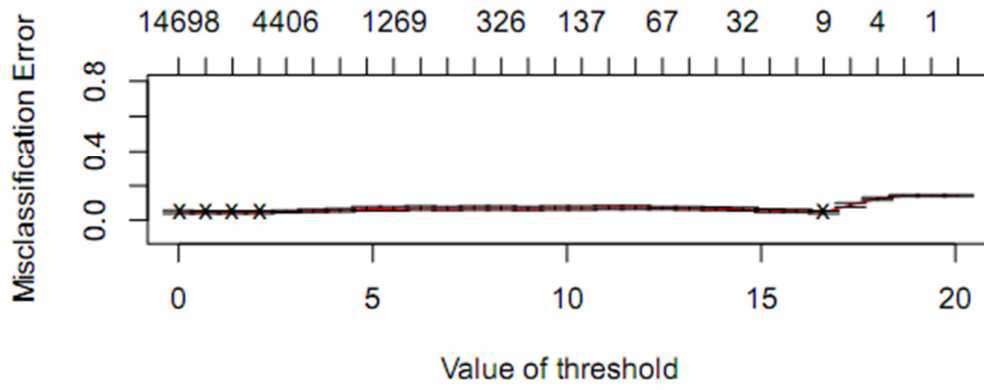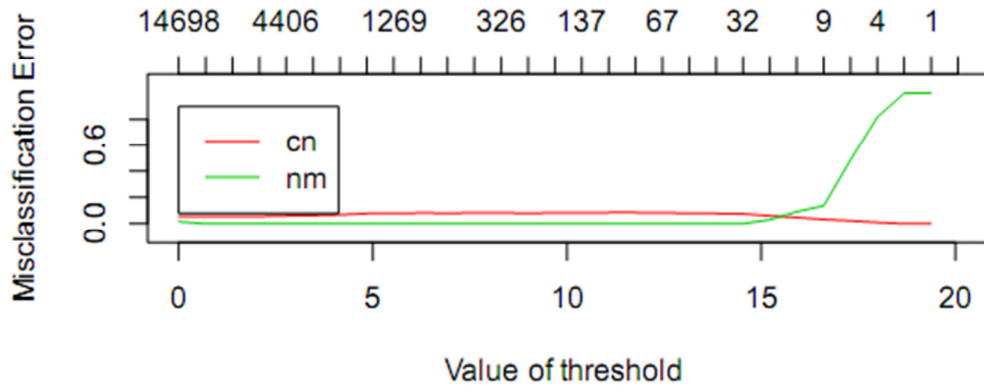

(c)

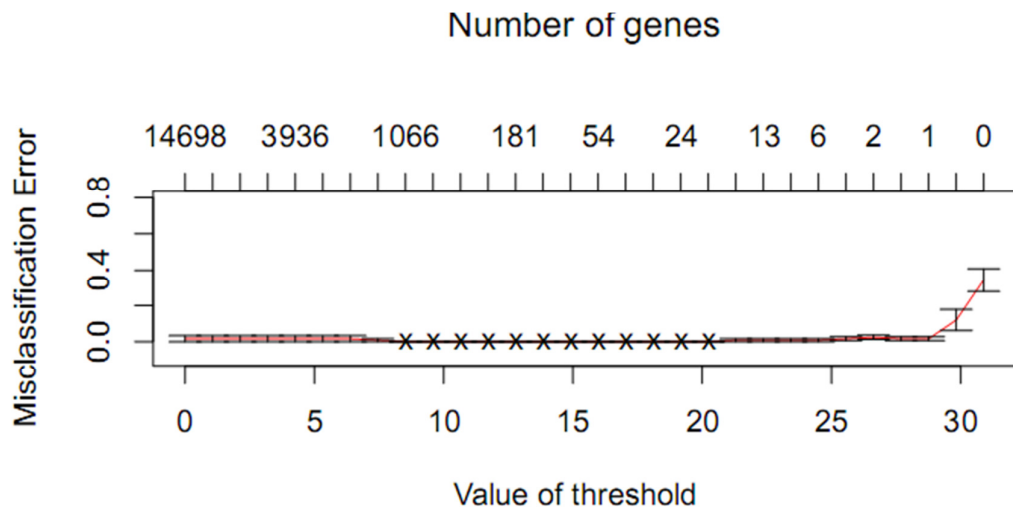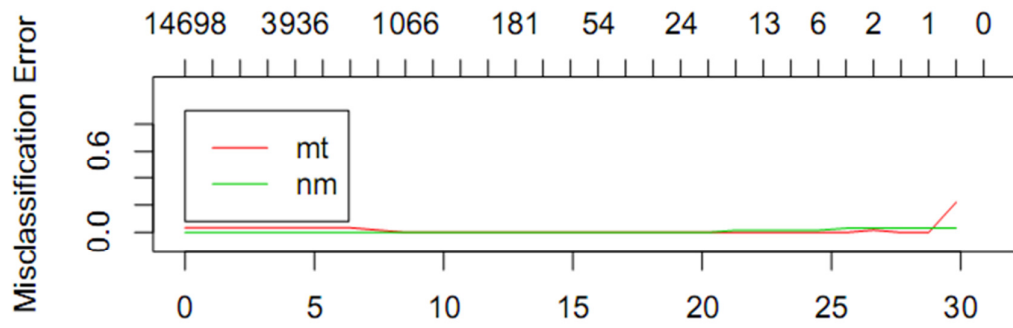

(d)

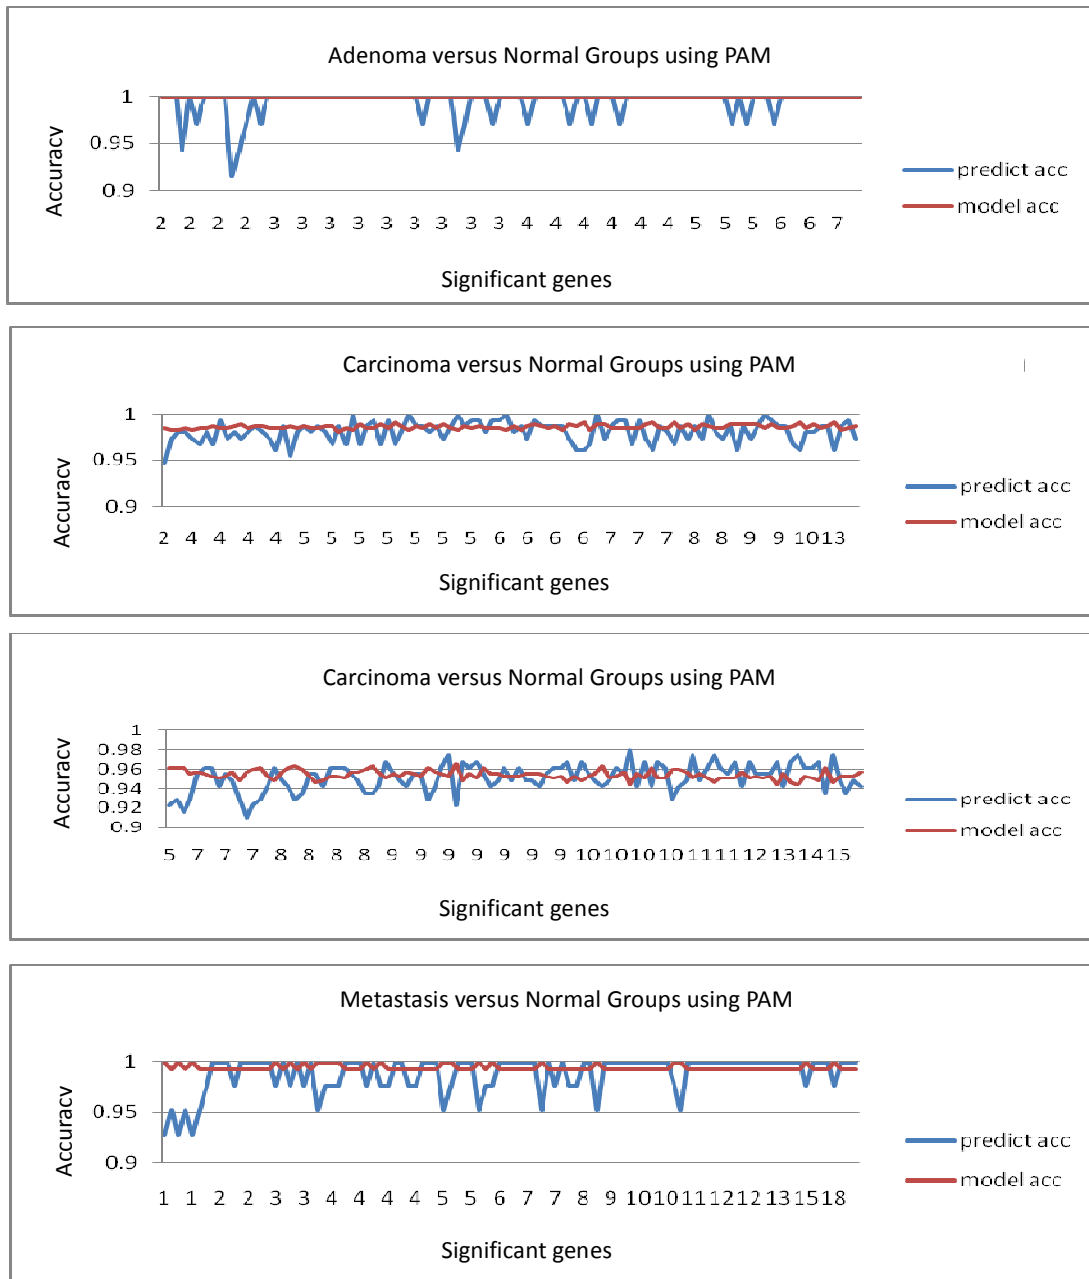

(e)

Figure 1 The figures (a)-(d) showed the relations among misclassification error, numbers of genes and the value of threshold of the PAM methods for the classification of colorectal tumors and normal mucosal tissues. There were four

comparison groups, ad versus nm, ac versus nm, cn versus nm and mt versus nm

shown in the figure1(a), (b), (c), and (d), respectively. The (e) shows that PAM

screens the candidate genes with highly statistical significances by bootstrapping and

cross-validation

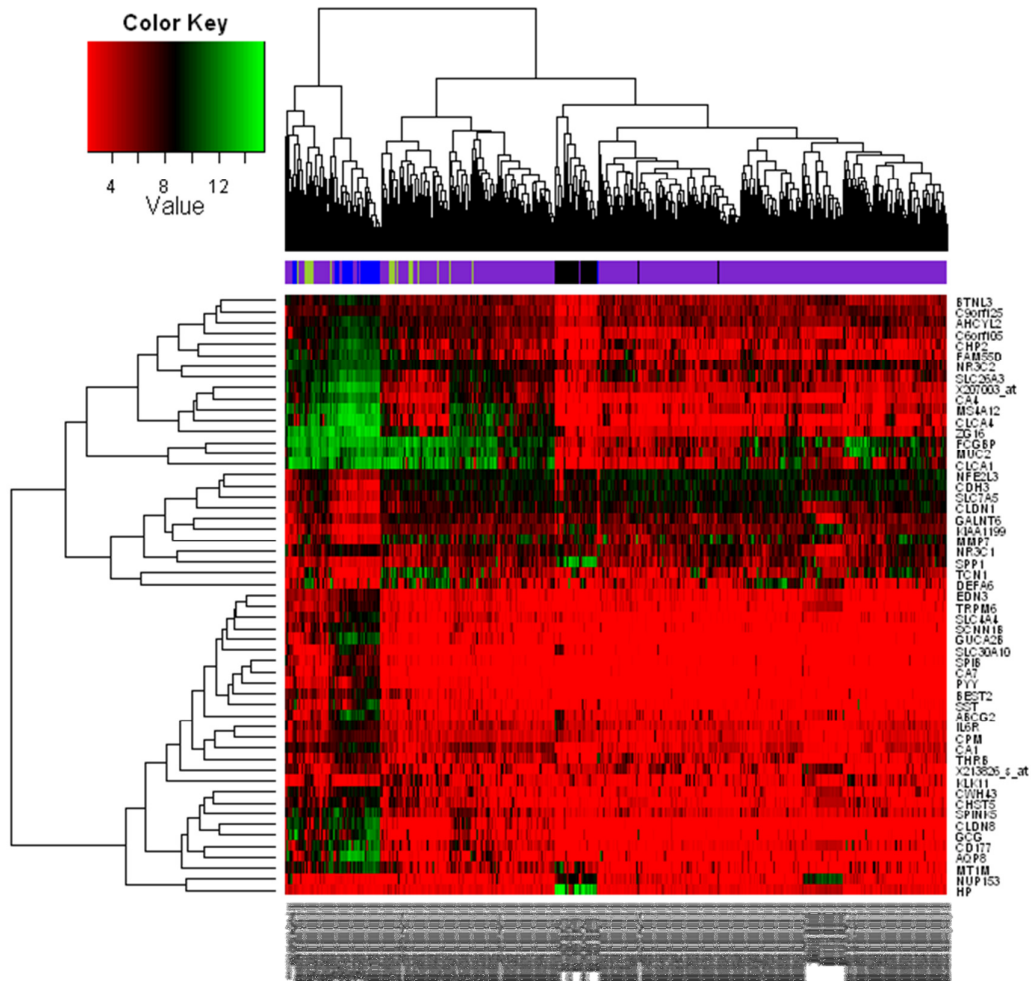

The Heatmap of 1274 samples and 55 PAM primary screening candidate genes using

GCRMA log2 normalization, the x axial presents 1274 samples with normal via blue,

adenoma via green, adenocarcinoma and carcinoma via purple and metastasis via

black. The y axial presents

55 PAM primary screening candidate genes.

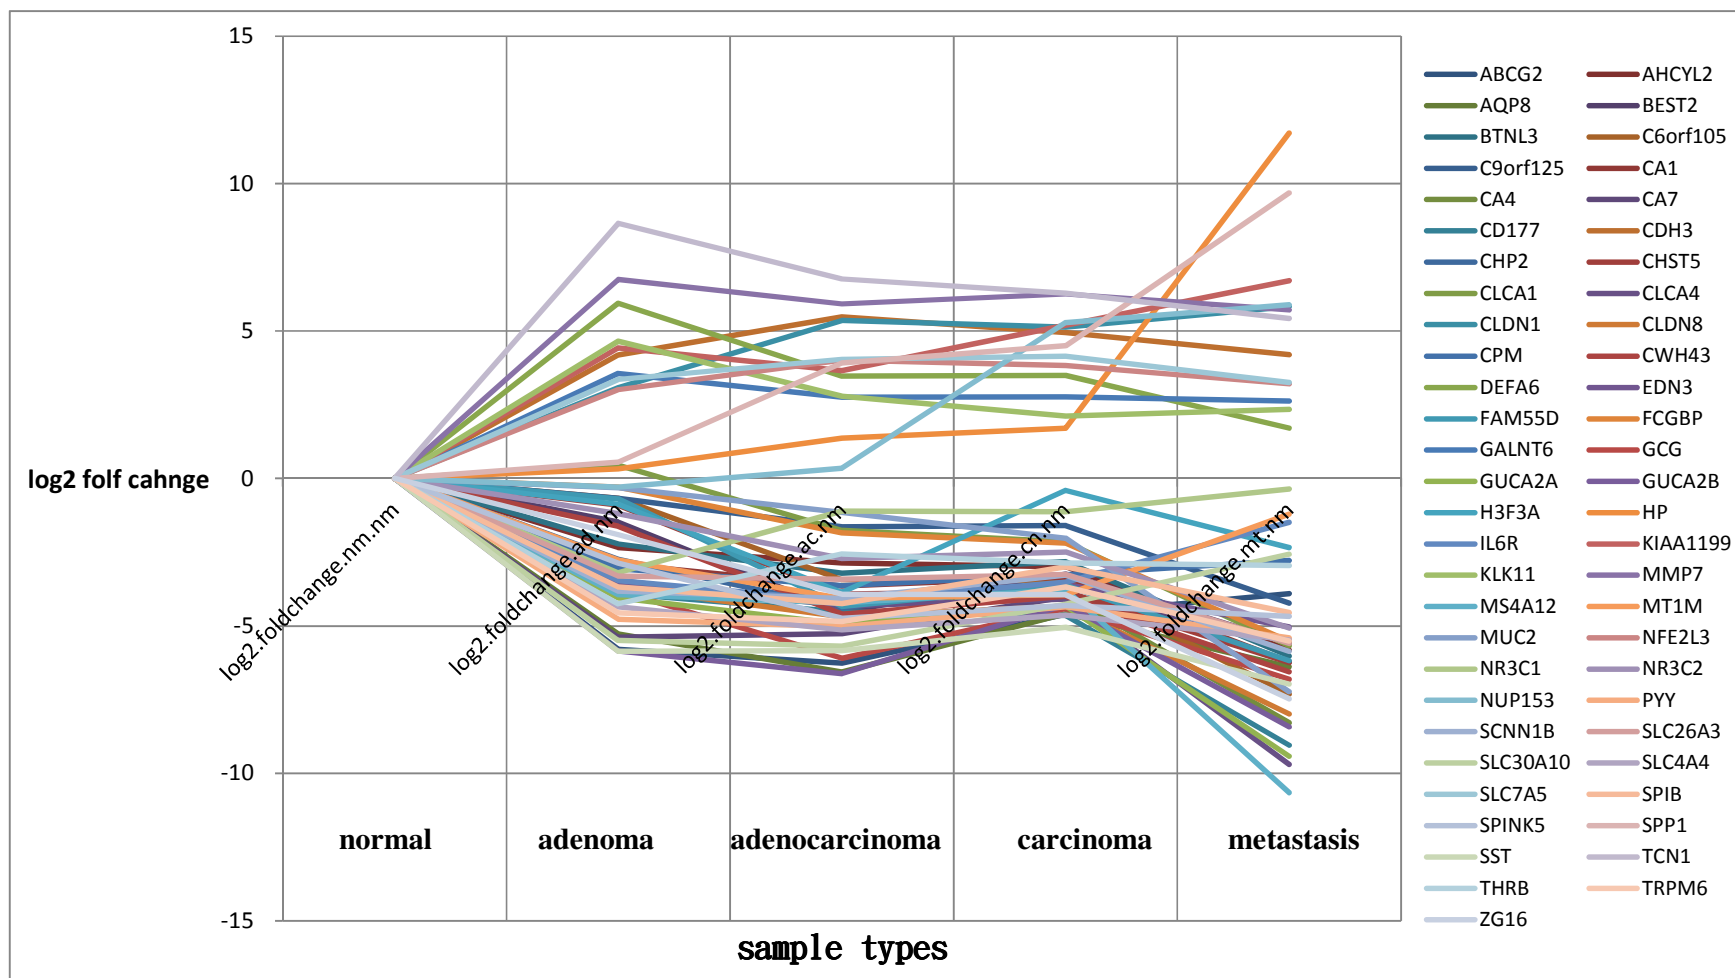

The following is 55 genes via GO molecular function view.

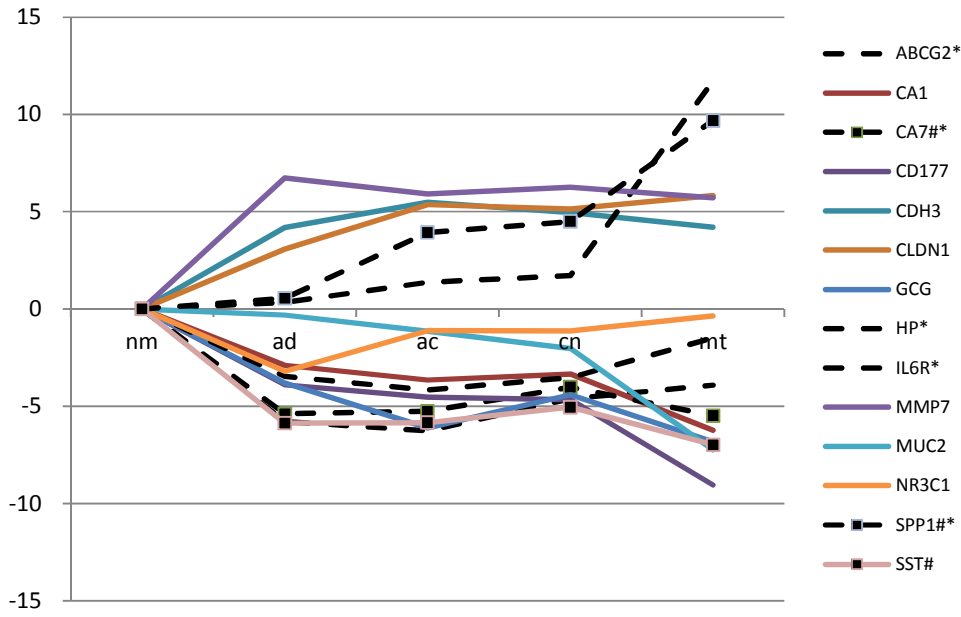

(a) Gelatinase activity

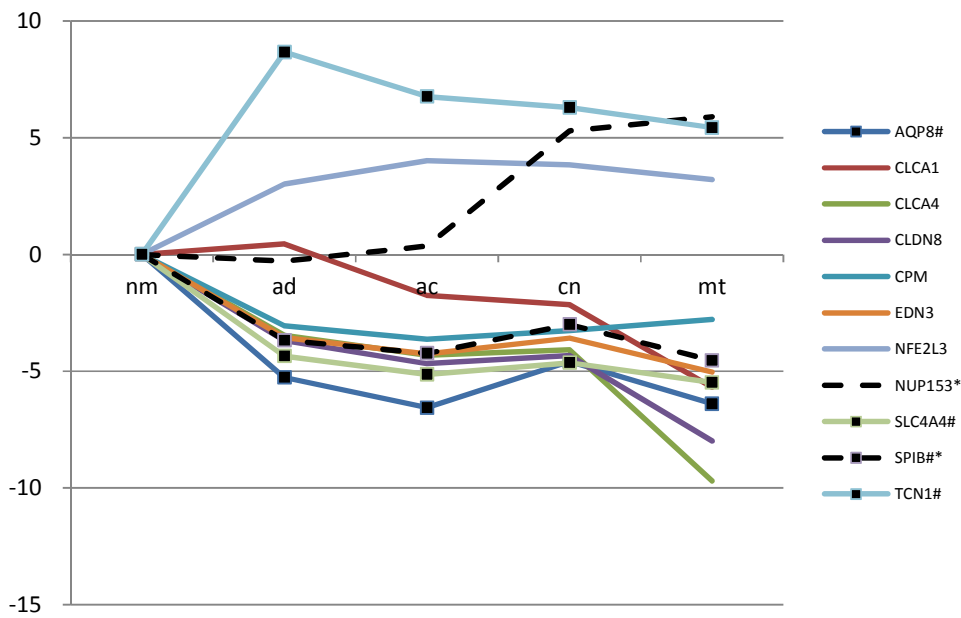

(b) Binding



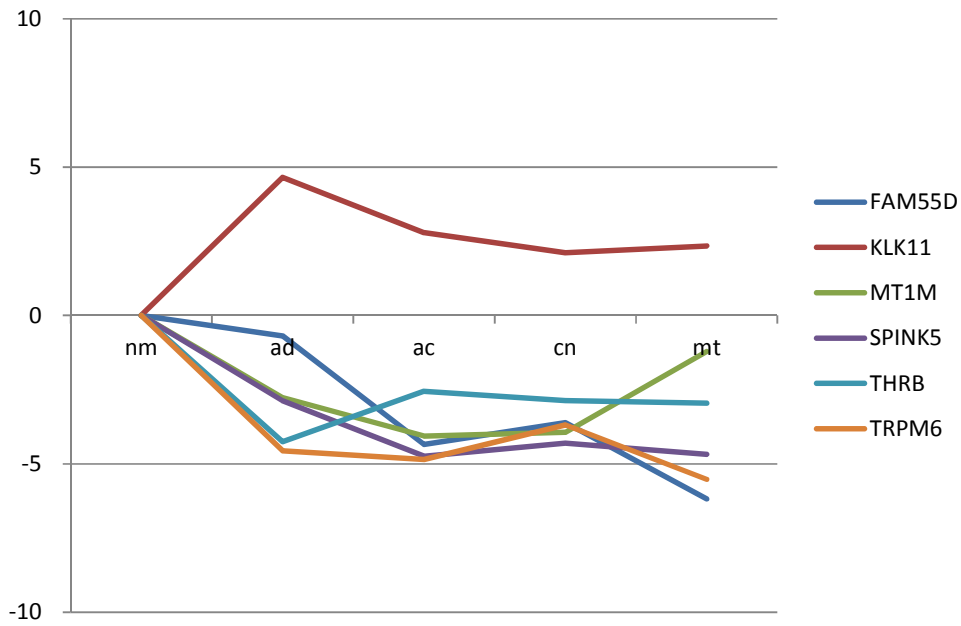

**(c) Catalytic activity**

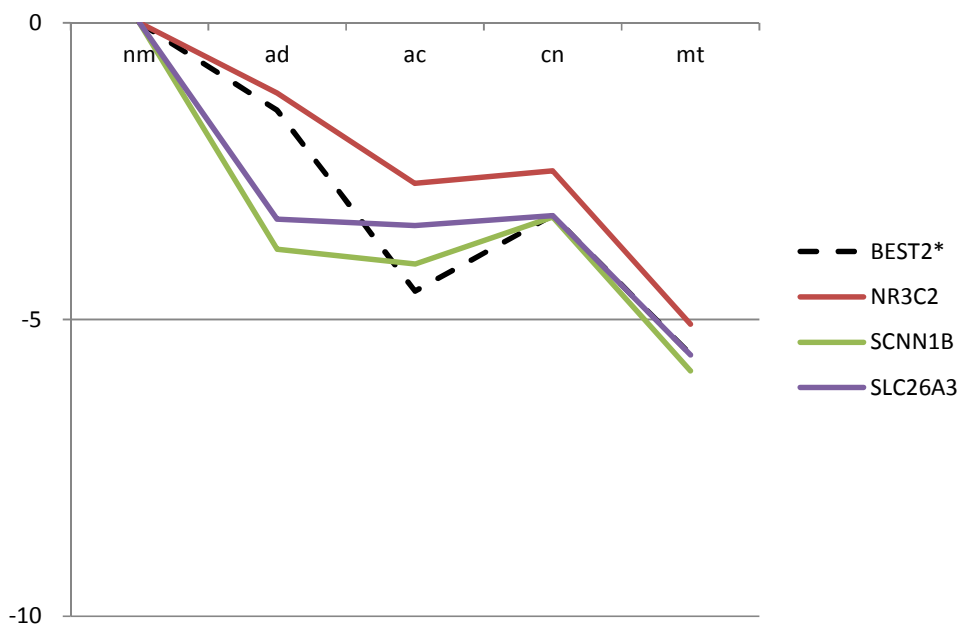

**(d) Transporter activity**

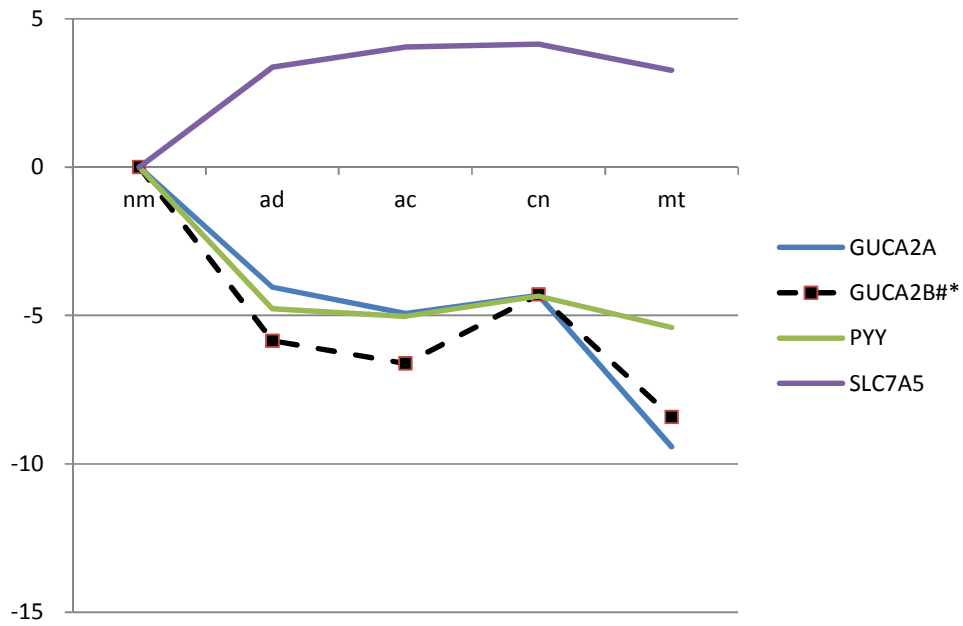

**(e) Enzyme regulator activity**

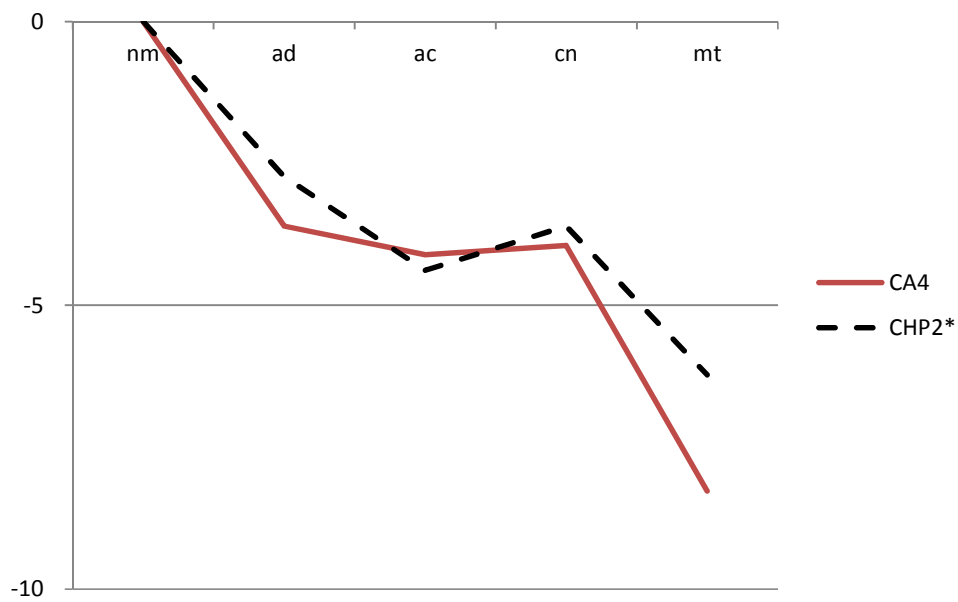

**(f) Protein phosphatase type 2B activity**

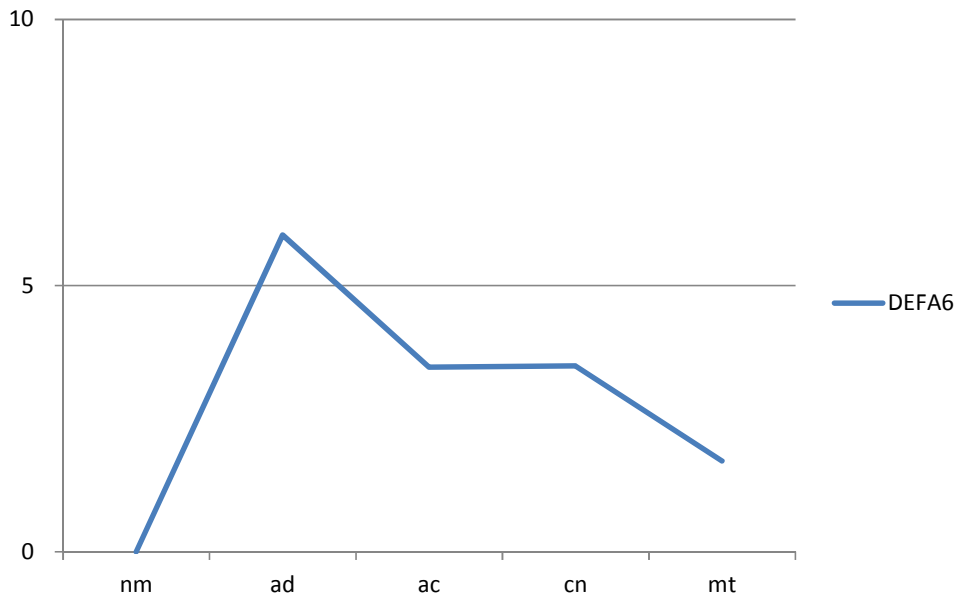

**(g) Other-interstitial collagenase activity**

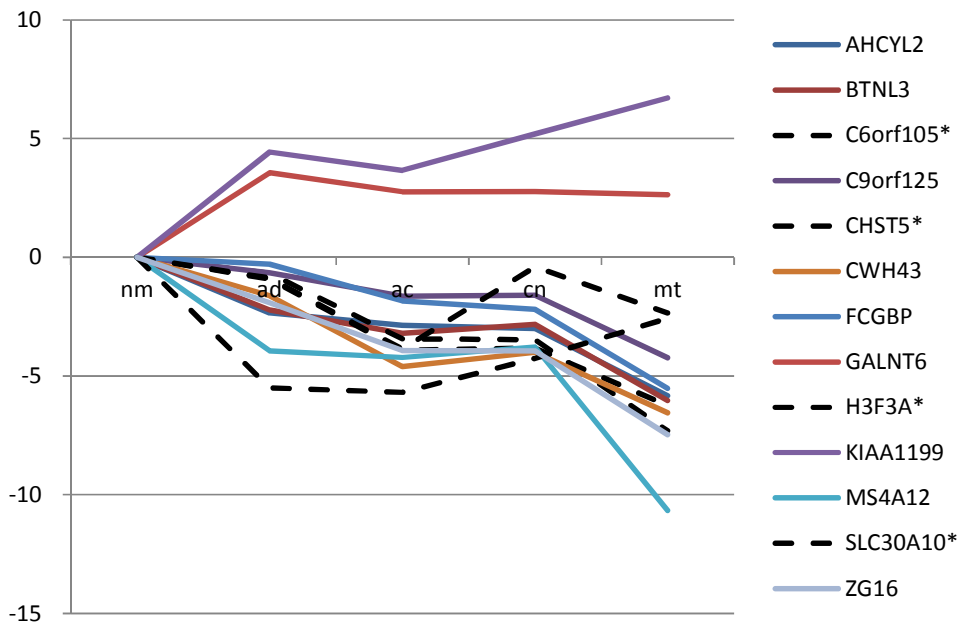

**(h) No annotation**

The following is 55 genes via GO biology process view.

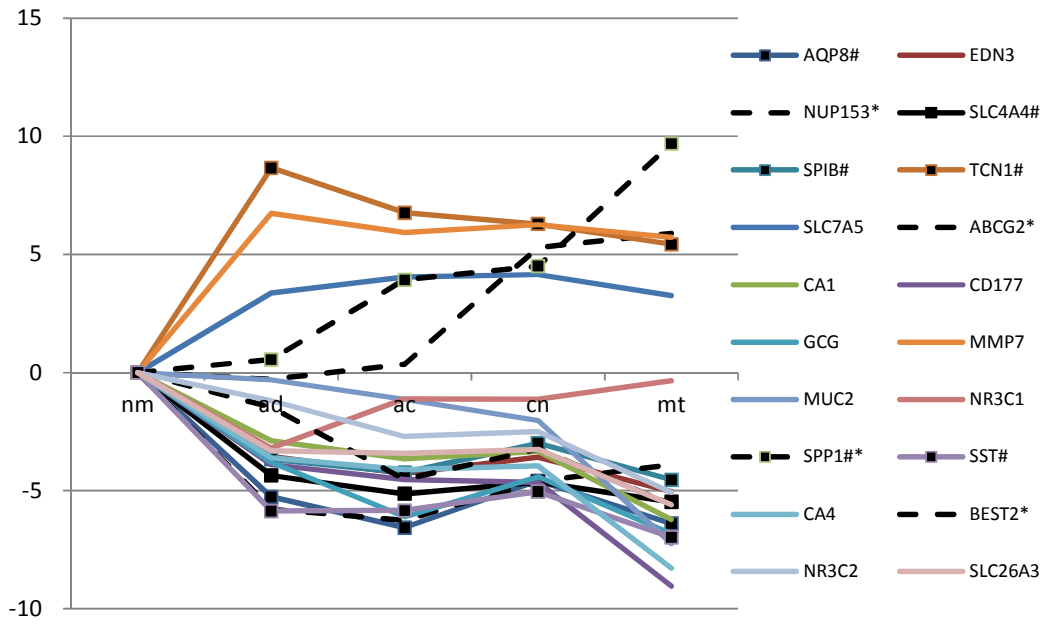

**(a) Transporters**

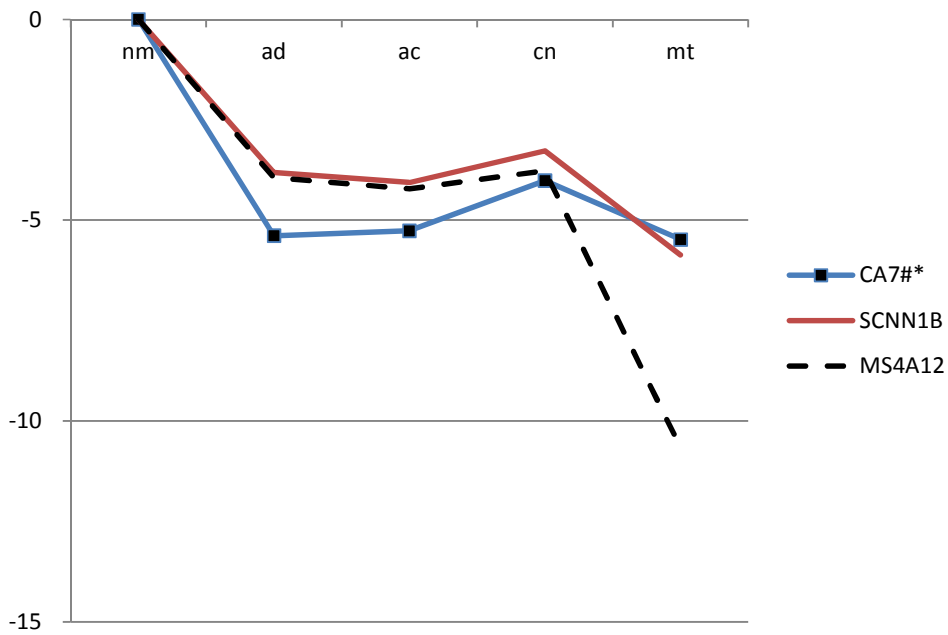

**(b) Biological regulation**

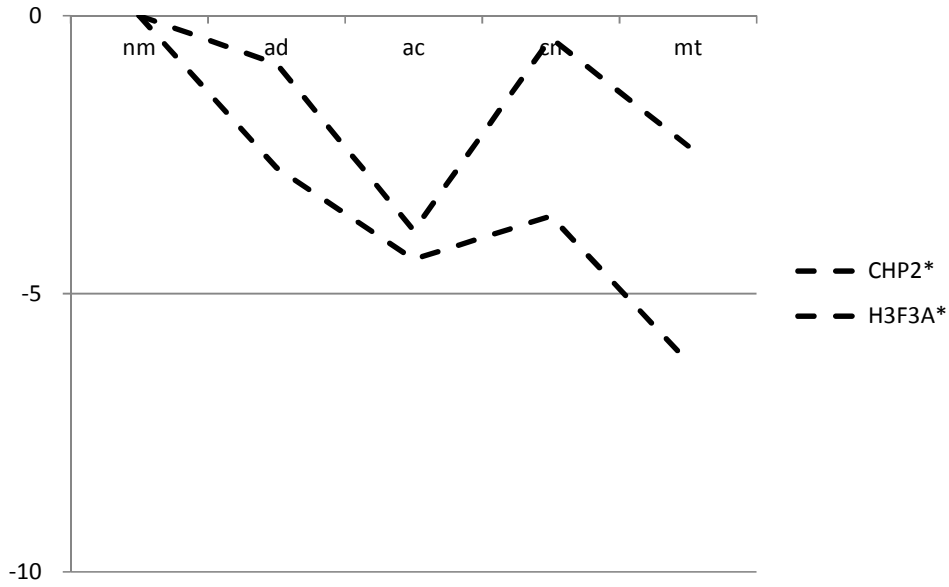

**(c) Chromatine modification**

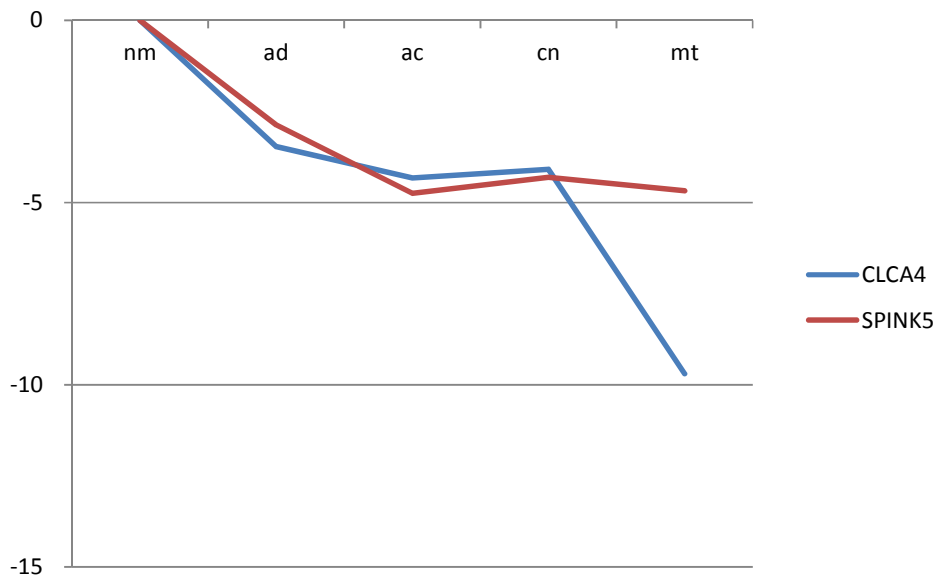

**(d) Extracellular matrix organization and biogenesis**

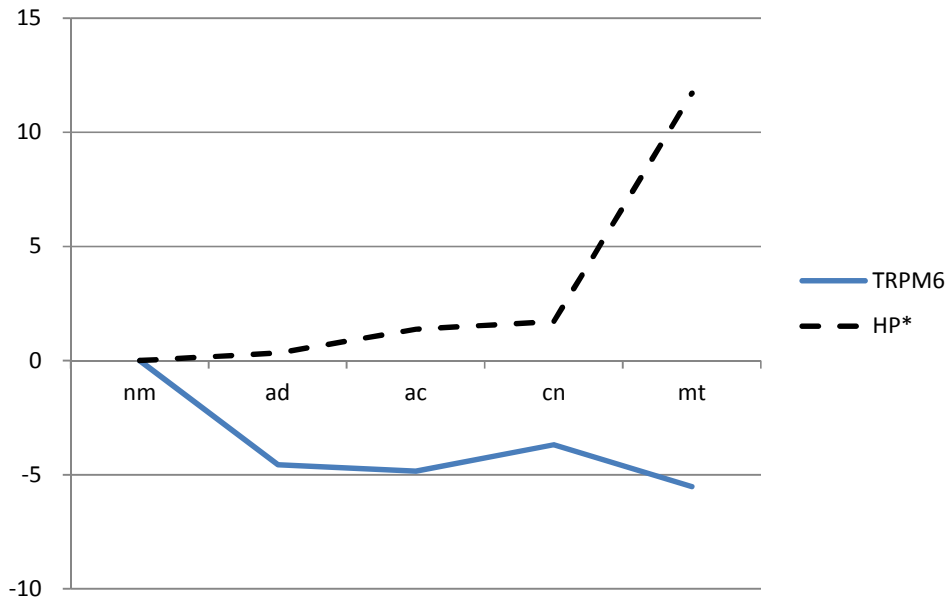

**(e) Localization 及 biological regulation**

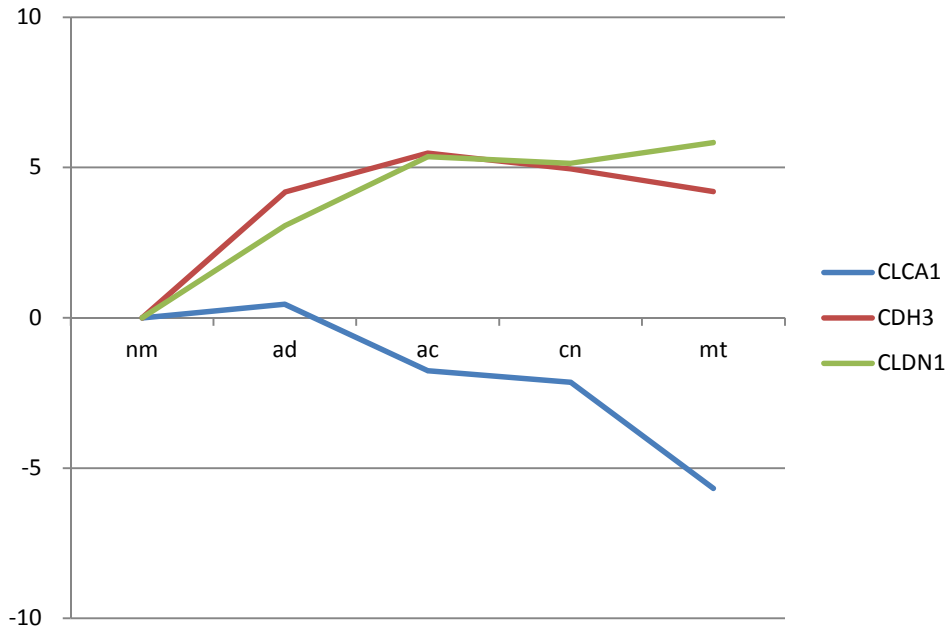

**(f) Biological adhesion**

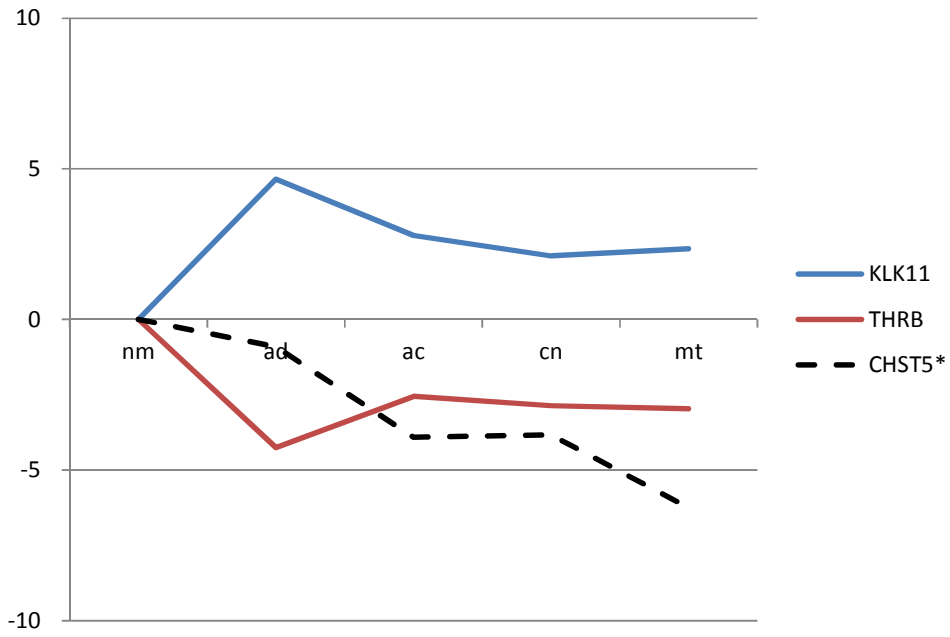

**(g) Metabolic process**

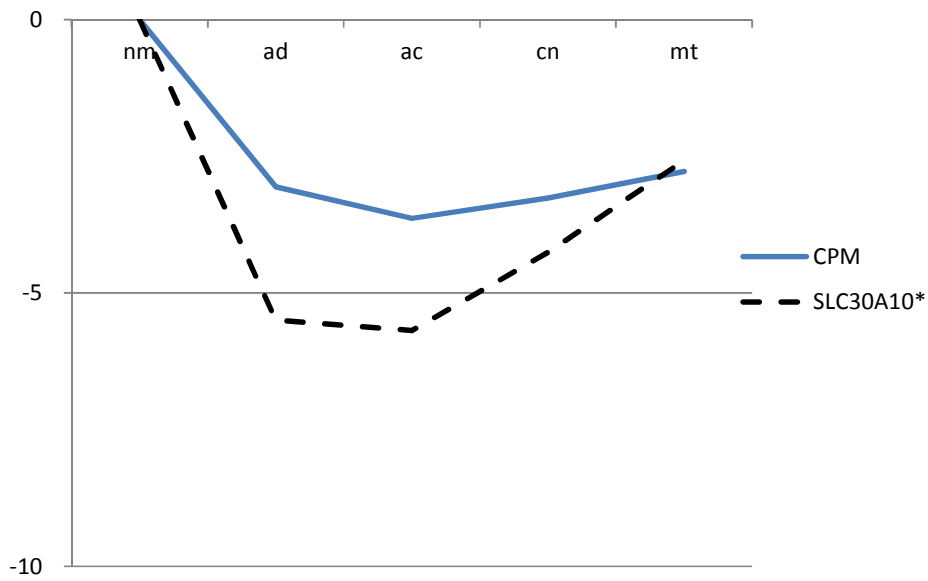

**(h) Insulin secretion**

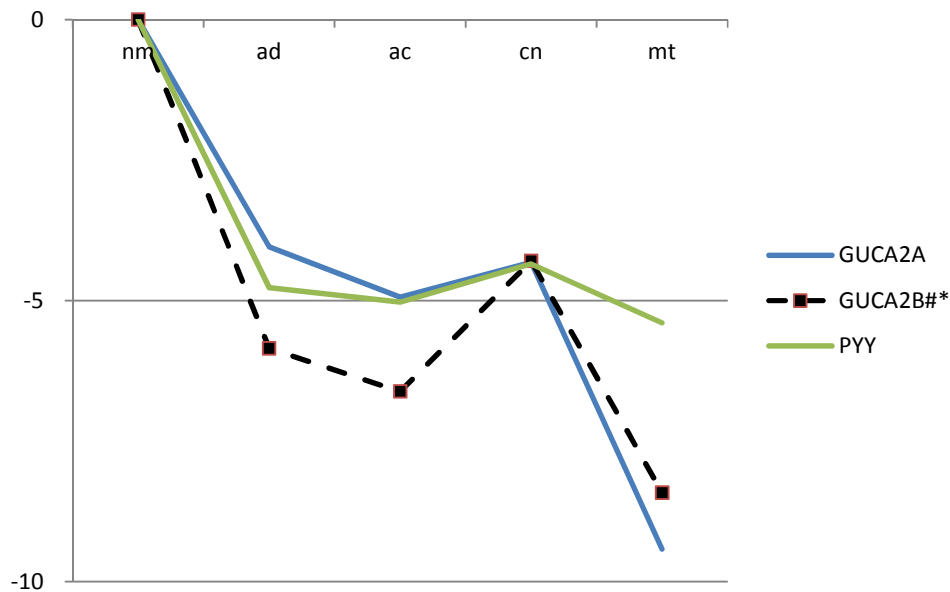

**(i) Signaling**

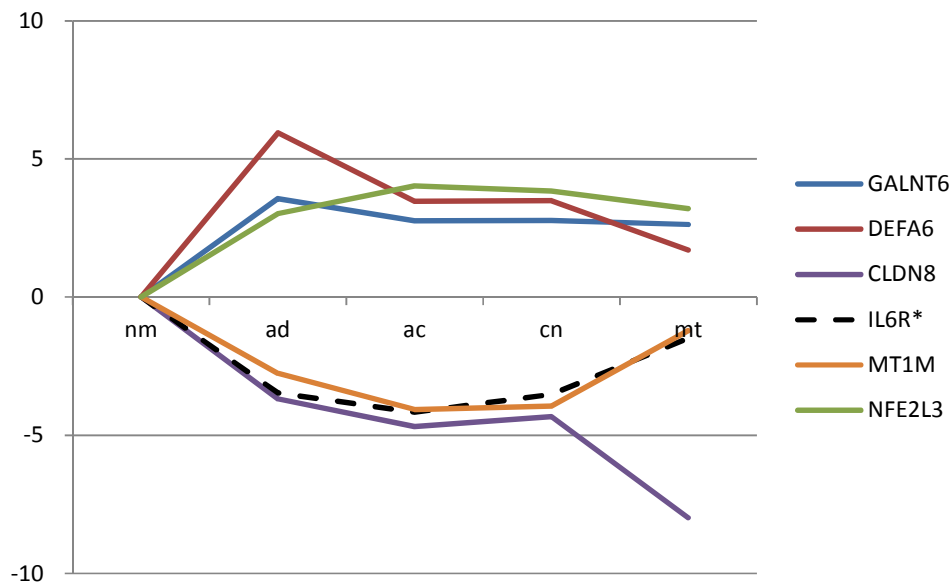

| Genes         | GO biological process                                    |
|---------------|----------------------------------------------------------|
| <i>GALNT6</i> | cell differentiation and epithelium development          |
| <i>DEFA6</i>  | cellular component organization or biogenesis            |
| <i>NFE2L3</i> | developmental process , multicellular organismal process |
| <i>CLDN8</i>  | follicle development                                     |
| <i>IL6R</i>   | immune system process                                    |



(j) Others

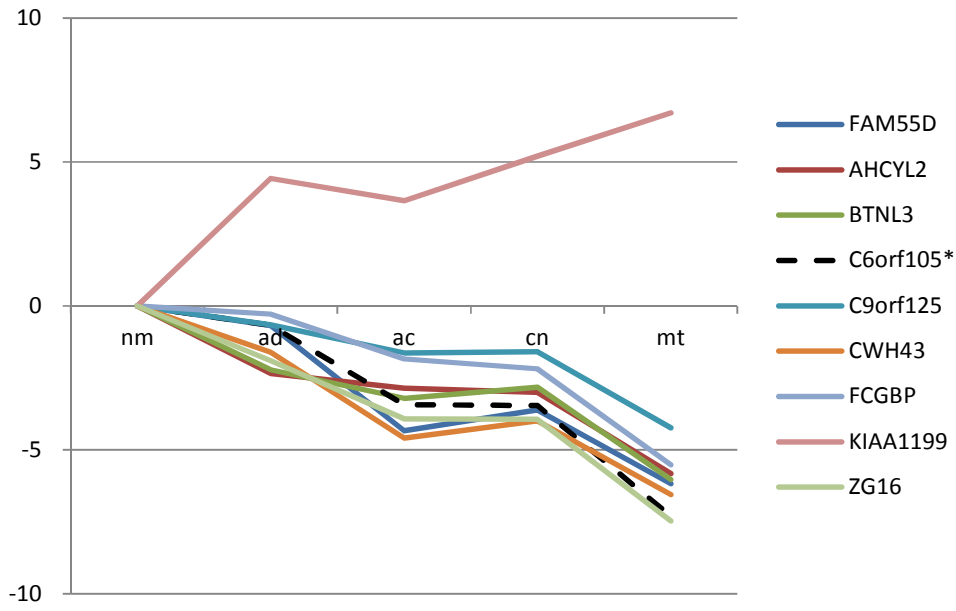

(k) No annotations

Table 5 Gene Ontology **Cellular Component** annotations of 55 significant genes

| <b>Gene symbol</b> | <b>Gene Ontology ID</b> | <b>Cellular component</b>   | <b>*p</b> |
|--------------------|-------------------------|-----------------------------|-----------|
| <i>CA7</i>         | GO:0009986              | cell surface                | 0         |
| <i>CD177</i>       |                         |                             |           |
| <i>CHP2</i>        |                         |                             |           |
| <i>CLCA1</i>       |                         |                             |           |
| <i>CPM</i>         |                         |                             |           |
| <i>DEFA6</i>       |                         |                             |           |
| <i>GUCA2A</i>      |                         |                             |           |
| <i>GUCA2B</i>      |                         |                             |           |
| <i>IL6R</i>        |                         |                             |           |
| <i>MS4A12</i>      |                         |                             |           |
| <i>NR3C2</i>       |                         |                             |           |
| <i>SCNN1B</i>      |                         |                             |           |
| <i>SLC26A3</i>     |                         |                             |           |
| <i>SLC7A5</i>      |                         |                             |           |
| <i>SPIB</i>        |                         |                             |           |
| <i>TCN1</i>        |                         |                             |           |
| <i>ABCG2</i>       | GO:0005923              | tight junction              | 0         |
| <i>AQP8</i>        |                         |                             |           |
| <i>CA1</i>         |                         |                             |           |
| <i>CDH3</i>        |                         |                             |           |
| <i>CLDN1</i>       |                         |                             |           |
| <i>CLDN8</i>       |                         |                             |           |
| <i>GCG</i>         |                         |                             |           |
| <i>HP</i>          |                         |                             |           |
| <i>MMP7</i>        |                         |                             |           |
| <i>MUC2</i>        |                         |                             |           |
| <i>NR3C1</i>       |                         |                             |           |
| <i>PYY</i>         |                         |                             |           |
| <i>SPP1</i>        |                         |                             |           |
| <i>SST</i>         |                         |                             |           |
| <i>TRPM6</i>       |                         |                             |           |
| <i>SPINK5</i>      | GO:0042599              | lamellar body               | 1.94E-06  |
| <i>H3F3A</i>       | GO:0016363              | nuclear matrix              | 5.78E-05  |
| <i>FCGBP</i>       | GO:0042597              | periplasmic space           | 0.01516   |
| <i>SLC4A4</i>      | GO:0016323              | basolateral plasma membrane | 4.59E-25  |
| <i>CA4</i>         | GO:0046658              | anchored to plasma          | 1.98E-14  |

| <b>Gene symbol</b> | <b>Gene Ontology ID</b> | <b>Cellular component</b> | <b>*p</b> |
|--------------------|-------------------------|---------------------------|-----------|
|                    |                         | membrane                  |           |
| <i>CLCA4</i>       | GO:0016324              | apical plasma membrane    | 1.20E-08  |
| <i>THRB</i>        | GO:0033391              | chromatoid body           |           |
| <i>BEST2</i>       | GO:0046930              | pore complex              | 2.32E-05  |
| <i>NUP153</i>      | GO:0005643              | nuclear pore              | 0         |

\*The p values of the enrichment analysis. The genes without Gene Ontology Cellular Component annotations were not shown in this table.

Table 6 Gene Ontology **Molecular Function** annotations of 55 significant genes

| Gene symbol                      | Gene Ontology ID | Molecular function                                          | *p        |
|----------------------------------|------------------|-------------------------------------------------------------|-----------|
| <b>Transporter activity</b>      |                  |                                                             |           |
| <i>SCNN1B</i>                    | GO:0015280       | amiloride-sensitive sodium channel activity                 | 0         |
| <i>SLC26A3</i>                   |                  |                                                             |           |
| <i>NR3C2</i>                     |                  |                                                             |           |
| <i>BEST2</i>                     | GO:0015267       | channel activity                                            | 2.05E-07  |
| <b>Binding</b>                   |                  |                                                             |           |
| <i>TCN1</i>                      | GO:0031419       | cobalamin binding                                           | 5.79E-165 |
| <i>SLC4A4</i>                    | GO:0042980       | cystic fibrosis transmembrane conductance regulator binding | 3.76E-77  |
| <i>NFE2L3</i>                    | GO:0031995       | insulin-like growth factor II binding                       | 0.005004  |
| <i>NUP153</i>                    | GO:0005521       | lamin binding                                               | 9.32E-53  |
| <i>AQP8</i>                      | GO:0042980       | cystic fibrosis transmembrane conductance regulator binding | 3.76E-77  |
| <i>CLCA1</i>                     |                  |                                                             |           |
| <i>CLCA4</i>                     |                  |                                                             |           |
| <i>CPM</i>                       | GO:0005179       | hormone activity                                            | 2.62E-08  |
| <i>CLDN8</i>                     | GO:0019864       | IgG binding                                                 | 3.76E-77  |
| <i>SPIB</i>                      | GO:0004912       | interleukin-3 receptor activity                             | 4.62E-10  |
| <i>EDN3</i>                      | GO:0005102       | receptor binding                                            | 9.80E-05  |
| <b>Catalytic activity</b>        |                  |                                                             |           |
| <i>TRPM6</i>                     | GO:0004686       | eukaryotic elongation factor-2 kinase activity              | 6.85E-52  |
| <i>THRБ</i>                      | GO:0004413       | homoserine kinase activity                                  | 2.28E-247 |
| <i>FAM55D</i>                    | GO:0016757       | transferase activity, transferring glycosyl groups          | 3.75E-39  |
| <i>SPINK5</i>                    | GO:0008236       | serine-type peptidase activity                              | 1.24E-124 |
| <i>KLK11</i>                     |                  |                                                             |           |
| <i>MT1M</i>                      | GO:0045289       | luciferin monooxygenase activity                            | 0.04519   |
| <i>CA4</i>                       | GO:0004647       | protein phosphatase type 2B activity                        | 7.68E-18  |
| <i>CHP2</i>                      |                  |                                                             |           |
| <b>Enzyme regulator activity</b> |                  |                                                             |           |
| <i>PYY</i>                       | GO:0030250       | guanylate cyclase activator activity                        | 0         |
| <i>GUCA2A</i>                    |                  |                                                             |           |
| <i>GUCA2B</i>                    |                  |                                                             |           |

| <b>Gene symbol</b>         | <b>Gene Ontology ID</b> | <b>Molecular function</b>         | <b>*p</b> |
|----------------------------|-------------------------|-----------------------------------|-----------|
| <i>SLC7A5</i>              | GO:0030414              | protease inhibitor activity       | 2.44E-08  |
| <i>Gelatinase activity</i> |                         |                                   |           |
| <i>ABCG2</i>               | GO:0004229              | gelatinase B activity             | 0         |
| <i>CA1</i>                 |                         |                                   |           |
| <i>CA7</i>                 |                         |                                   |           |
| <i>CD177</i>               |                         |                                   |           |
| <i>CDH3</i>                |                         |                                   |           |
| <i>CLDN1</i>               |                         |                                   |           |
| <i>GCG</i>                 |                         |                                   |           |
| <i>HP</i>                  |                         |                                   |           |
| <i>IL6R</i>                |                         |                                   |           |
| <i>MMP7</i>                |                         |                                   |           |
| <i>MUC2</i>                |                         |                                   |           |
| <i>NR3C1</i>               |                         |                                   |           |
| <i>SPP1</i>                |                         |                                   |           |
| <i>SST</i>                 |                         |                                   |           |
| <i>Others</i>              |                         |                                   |           |
| <i>DEFA6</i>               | GO:0004232              | interstitial collagenase activity | 0         |

\*The p values of the enrichment analysis. The genes without Gene Ontology Molecular Function annotations were not shown in this table.

Table 7 Gene Ontology Biological Process annotations of 55 significant genes

| Gene symbol                       | Gene Ontology ID | Biological process        | Categories          | *p        |
|-----------------------------------|------------------|---------------------------|---------------------|-----------|
| <b><i>Biological adhesion</i></b> |                  |                           |                     |           |
| <i>CDH3</i>                       | GO:0016337       | cell-cell adhesion        | biological adhesion | 3.94E-141 |
| <i>CLCA1</i>                      | GO:0016337       |                           |                     |           |
| <i>CLDN1</i>                      | GO:0016337       |                           |                     |           |
| <b><i>Signaling</i></b>           |                  |                           |                     |           |
| <i>GUCA2A</i>                     | GO:0007168       | receptor guanylyl cyclase | signaling           | 0         |
| <i>GUCA2B</i>                     | GO:0007168       | signaling pathway         |                     |           |
| <i>PYY</i>                        | GO:0007268       | synaptic transmission     |                     | 3.01E-219 |
| <b><i>Transportation</i></b>      |                  |                           |                     |           |
| <i>ABCG2</i>                      | GO:0006865       | amino acid transport      | transport           | 1.64E-245 |
| <i>CA1</i>                        | GO:0006865       |                           |                     |           |
| <i>CA4</i>                        | GO:0006865       |                           |                     |           |
| <i>CDI77</i>                      | GO:0006865       |                           |                     |           |

| <b>Gene symbol</b> | <b>Gene Ontology ID</b> | <b>Biological process</b> | <b>Categories</b>                               | <b>*p</b> |
|--------------------|-------------------------|---------------------------|-------------------------------------------------|-----------|
| <i>GCG</i>         | GO:0006865              |                           |                                                 |           |
| <i>NR3C1</i>       | GO:0030198              |                           |                                                 |           |
| <i>SLC7A5</i>      | GO:0030147              |                           |                                                 |           |
| <i>SST</i>         | GO:0006865              |                           |                                                 |           |
| <i>AQP8</i>        | GO:0006833              | water transport           |                                                 | 1.13E-135 |
| <i>EDN3</i>        | GO:0006833              |                           |                                                 |           |
| <i>SLC26A3</i>     | GO:0006833              |                           |                                                 |           |
| <i>SLC4A4</i>      | GO:0006833              |                           |                                                 |           |
| <i>MMP7</i>        | GO:0042640              | nuclear import            |                                                 | 2.16E-174 |
| <i>MUC2</i>        | GO:0030198              |                           |                                                 |           |
| <i>NUP153</i>      | GO:0051170              |                           |                                                 |           |
| <i>SPIB</i>        | GO:0030147              |                           |                                                 |           |
| <i>SPP1</i>        | GO:0006814              |                           |                                                 |           |
| <i>BEST2</i>       | GO:0006811              | ion transport             |                                                 | 5.71E-13  |
| <i>NR3C2</i>       | GO:0046847              | sodium ion transport      |                                                 | 1.36E-07  |
| <i>TCN1</i>        | GO:0035146              | cobalamin transport       |                                                 | 1.20E-57  |
| <i>Others</i>      |                         |                           |                                                 |           |
| <i>CHP2</i>        | GO:0051567              | histone H3-K9 methylation | chromatine modification                         | 1.05E-163 |
| <i>H3F3A</i>       | GO:0043486              | histone exchange          |                                                 | 2.66E-38  |
| <i>GALNT6</i>      | GO:0031424              | keratinization            | cell differentiation and epithelium development | 1.13E-11  |

| <b>Gene symbol</b> | <b>Gene Ontology ID</b> | <b>Biological process</b>                        | <b>Categories</b>                                          | <b>*p</b> |
|--------------------|-------------------------|--------------------------------------------------|------------------------------------------------------------|-----------|
| <i>DEFA6</i>       | GO:0046847              | filopodium formation                             | cellular component organization or biogenesis              | 1.13E-11  |
| <i>CLCA4</i>       | GO:0030198              | extracellular matrix organization and biogenesis | extracellular matrix organization and biogenesis           | 0         |
| <i>SPINK5</i>      |                         |                                                  |                                                            |           |
| <i>NFE2L3</i>      | GO:0035146              | tube fusion                                      | developmental process, multicellular organismal process    | 9.96E-112 |
| <i>MS4A12</i>      | GO:0016458              | gene silencing                                   | biological regulation, metabolic process, cellular process | 4.45E-09  |
| <i>CLDN8</i>       | GO:0042640              | anagen                                           | follicle development                                       | 1.95E-07  |
| <i>IL6R</i>        | GO:0030225              | macrophage differentiation                       | immune system process                                      | 3.05E-15  |
| <i>KLK11</i>       | GO:0031638              | zymogen activation                               | metabolic process                                          | 1.47E-07  |
| <i>CHST5</i>       | GO:0018146              | keratan sulfate biosynthetic process             | metabolic process, cellular process                        | 7.03E-199 |
| <i>THRB</i>        | GO:0009088              | threonine biosynthetic process                   | metabolic process, cellular process                        | 0         |
| <i>MTIM</i>        | GO:0006805              | xenobiotic metabolic process                     | response to stimulus                                       | 8.15E-18  |
| <i>CPM</i>         | GO:0030073              | insulin secretion                                | insulin secretion                                          | 6.54E-76  |
| <i>SLC30A10</i>    |                         |                                                  |                                                            |           |
| <i>HP</i>          | GO:0030147              | natriuresis                                      | localization, biological regulation                        | 6.55E-26  |
| <i>TRPM6</i>       |                         |                                                  |                                                            |           |
| <i>CA7</i>         | GO:0055081              | anion homeostasis                                | biological regulation                                      | 2.00E-297 |
| <i>SCNN1B</i>      | GO:0030104              | water homeostasis                                |                                                            | 1.67E-76  |

\*The p values of the enrichment analysis. The genes without Gene Ontology Biological Process annotations were not shown in this table.





**Table 8** The numbers of selected genes using PAM, CART, C5.0 and ANN in 1,000 bootstrapping rounds for classifying colorectal tumors and normal mucosal tissues.

| <b>Gene selection model</b> | <b>min</b> | <b>median</b> | <b>Max</b> | <b>Mean</b> |
|-----------------------------|------------|---------------|------------|-------------|
| <b>PAM</b>                  | <b>2</b>   | <b>8</b>      | <b>11</b>  | <b>7.7</b>  |
| <b>CART</b>                 | <b>1</b>   | <b>2</b>      | <b>4</b>   | <b>1.7</b>  |
| <b>C5.0</b>                 | <b>1</b>   | <b>4</b>      | <b>7</b>   | <b>3.7</b>  |
| <b>ANN</b>                  | <b>5</b>   | <b>5</b>      | <b>5</b>   | <b>5</b>    |

ANN can not filter out the significant genes as do the other three methods. Therefore, we split the total of 55 input variables (genes) into 5,10,15,...,55 genes on the basis of the relative importance of genes. This table presented the number of genes with the relative good performance of the ANN model.

**Table 9 Multivariate logistic regression of 55 significant genes and demographics**

| Gene symbol     | Model1 <sup>‡</sup> |     | Model2 <sup>‡</sup> |     | Model3 <sup>  </sup> |      | Model4 <sup>+</sup> |     | Model5 <sup>§</sup> |     | Model6 <sup>@</sup> |      |
|-----------------|---------------------|-----|---------------------|-----|----------------------|------|---------------------|-----|---------------------|-----|---------------------|------|
|                 | (n=1,274)           |     | (n=759)             |     | (n=1,274)            |      | (n=272)             |     | (n=722)             |     | (n=185)             |      |
|                 | OR                  | p   | OR                  | p   | OR                   | p    | OR                  | p   | OR                  | p   | OR                  | p    |
| <i>ABCG2</i>    | 0.47                | *** | 0.18                | *** | 0.47                 | ***  | 0.55                | *** | 0.18                | *** | 0.19                | *    |
| <i>AHCYL2</i>   | 0.14                | *** | 4.74E-3             | **  | 0.14                 | ***  | 0.22                | *** | 0.01                | **  | 0.02                | *    |
| <i>AQP8</i>     | 0.57                | *** | 0.27                | *** | 0.58                 | ***  | 0.62                | *** | 0.27                | *** | 0.17                | 0.06 |
| <i>BEST2</i>    | 0.35                | *** | 0.38                | *** | 0.30                 | ***  | 0.31                | *** | 0.40                | *** | 0.51                | *    |
| <i>BTNL3</i>    | 0.20                | *** | 0.19                | *** | 0.21                 | ***  | 0.24                | *** | 0.21                | *** | 0.21                | *    |
| <i>C6orf105</i> | 0.32                | *** | 0.20                | *** | 0.30                 | ***  | 0.35                | *** | 0.23                | *** | 0.04                | 0.06 |
| <i>C9orf125</i> | 0.05                | *** | 0.06                | *** | 0.05                 | ***  | 0.06                | *** | 0.06                | *** | 0.04                | **   |
| <i>CA1</i>      | 0.24                | *** | 0.22                | *** | 0.25                 | ***  | 0.27                | *** | 0.22                | *** | 0.17                | 0.07 |
| <i>CA4</i>      | 0.41                | *** | 0.21                | *** | 0.43                 | ***  | 0.47                | *** | 0.28                | *** | 0.33                | 0.10 |
| <i>CA7</i>      | 0.29                | *** | 0.30                | *** | 0.29                 | ***  | 0.38                | *** | 0.34                | *** | 0.46                | **   |
| <i>CD177</i>    | 0.53                | *** | 0.37                | *** | 0.52                 | ***  | 0.53                | *** | 0.40                | *** | 0.36                | *    |
| <i>CDH3</i>     | 3.08                | *** | 3.13                | *** | 3.03                 | ***  | 3.32                | *** | 2.98                | *** | 3.01                | 0.22 |
| <i>CHP2</i>     | 0.21                | *** | 0.24                | *** | 0.19                 | ***  | 0.25                | *** | 0.23                | *** | 2.14E-4             | *    |
| <i>CHST5</i>    | 0.37                | *** | 0.48                | *** | 0.33                 | ***  | 0.26                | *** | 0.51                | *** | 0.42                | *    |
| <i>CLCA1</i>    | 0.62                | *** | 0.70                | *** | 0.53                 | ***  | 0.60                | *** | 0.71                | *** | 0.63                | *    |
| <i>CLCA4</i>    | 0.48                | *** | 0.09                | *** | 0.51                 | ***  | 0.61                | *** | 0.09                | *** | 0.04                | 0.18 |
| <i>CLDN1</i>    | 6.16                | *** | 7.28                | *** | 5.25                 | ***  | 5.00                | *** | 6.49                | *** | 3.54                | 0.53 |
| <i>CLDN8</i>    | 0.45                | *** | 0.46                | *** | 0.44                 | ***  | 0.39                | *** | 0.47                | *** | 0.65                | *    |
| <i>CPM</i>      | 0.20                | *** | 0.23                | *** | 0.20                 | ***  | 0.22                | *** | 0.25                | *** | 0.29                | *    |
| <i>CWH43</i>    | 0.21                | *** | 0.04                | *** | 0.20                 | ***  | 0.13                | *** | 0.04                | *** | 0.07                | *    |
| <i>DEFA6</i>    | 1.34                | *** | 1.73                | **  | 1.38                 | ***  | 1.35                | *** | 1.75                | **  | 1.52                | 0.18 |
| <i>EDN3</i>     | 0.19                | *** | 0.18                | *** | 0.19                 | ***  | 0.22                | *** | 0.18                | *** | 0.27                | *    |
| <i>FAM55D</i>   | 0.29                | *** | 0.11                | *** | 0.29                 | ***  | 0.28                | *** | 0.12                | *** | 0.20                | 0.05 |
| <i>FCGBP</i>    | 0.35                | *** | 0.41                | *** | 0.29                 | ***  | 0.26                | *** | 0.39                | *** | 0.24                | *    |
| <i>GALNT6</i>   | 2.06                | *** | 2.00                | *** | 2.33                 | ***  | 1.43                | *** | 1.95                | *** | 2.31                | *    |
| <i>GCG</i>      | 0.52                | *** | 0.59                | *** | 0.44                 | ***  | 0.53                | *** | 0.60                | *** | 0.59                | *    |
| <i>GUCA2A</i>   | 0.41                | *** | 0.23                | *** | 0.42                 | ***  | 0.50                | *** | 0.25                | *** | 0.33                | 0.09 |
| <i>GUCA2B</i>   | 0.47                | *** | 0.37                | *** | 0.48                 | ***  | 0.57                | *** | 0.39                | *** | 0.41                | 0.11 |
| <i>H3F3A</i>    | 0.63                | *** | 0.62                | *** | 0.49                 | ***  | 0.99                | 0.9 | 0.60                | *** | 0.42                | *    |
| <i>HP</i>       | 2.83                | *** | 32.99               | *** | 1.65                 | 0.06 | 4.46                | *** | 30.50               | *** | 2.86E+11            | *    |
| <i>IL6R</i>     | 0.24                | *** | 0.22                | *** | 0.20                 | ***  | 0.27                | *** | 0.19                | *** | 0.05                | *    |
| <i>KIAA1199</i> | 11.43               | *** | 22.93               | *** | 11.63                | ***  | 6.52                | *** | 84.47               | **  | 4.95                | 0.13 |
| <i>KLK11</i>    | 2.16                | *** | 4.09E+6             | *** | 1.70                 | ***  | 1.69                | **  | 1.79E+6             | **  | 3.57E+9             | 0.10 |
| <i>MMP7</i>     | 3.31                | *** | 6.86                | *** | 3.30                 | ***  | 4.00                | *** | 5.59                | *** | -                   | -    |
| <i>MS4A12</i>   | 0.39                | *** | 0.20                | *** | 0.42                 | ***  | 0.46                | *** | 0.22                | *** | 0.33                | 0.09 |

| Gene symbol     | Model1 <sup>‡</sup> |     | Model2 <sup>‡</sup> |     | Model3 <sup>  </sup> |     | Model4 <sup>+</sup> |     | Model5 <sup>%</sup> |     | Model6 <sup>@</sup> |      |
|-----------------|---------------------|-----|---------------------|-----|----------------------|-----|---------------------|-----|---------------------|-----|---------------------|------|
|                 | (n=1,274)           |     | (n=759)             |     | (n=1,274)            |     | (n=272)             |     | (n=722)             |     | (n=185)             |      |
|                 | OR                  | p   | OR                  | p   | OR                   | p   | OR                  | p   | OR                  | p   | OR                  | p    |
| <b>MT1M</b>     | 0.48                | *** | 0.43                | *** | 0.44                 | *** | 0.40                | *** | 0.46                | *** | 0.70                | *    |
| <b>MUC2</b>     | 0.58                | *** | 0.68                | *** | 0.49                 | *** | 0.48                | *** | 0.66                | **  | 0.63                | 0.07 |
| <b>NFE2L3</b>   | 2.73                | *** | 2.57                | *** | 2.82                 | *** | 2.57                | *** | 2.39                | *** | 1.55                | 0.05 |
| <b>NR3C1</b>    | 0.45                | *** | 0.40                | *** | 0.44                 | *** | 0.36                | *** | 0.48                | *** | 0.78                | 0.20 |
| <b>NR3C2</b>    | 0.05                | *** | 0.07                | *** | 0.05                 | *** | 0.07                | *** | 0.09                | *** | 0.01                | *    |
| <b>NUP153</b>   | 1.61                | *** | 1.35                | 0.2 | 2.04                 | **  | 1.76                | *** | 1.36                | 0.2 | 1.24                | 0.71 |
| <b>PYY</b>      | 0.31                | *** | 0.34                | *** | 0.27                 | *** | 0.27                | *** | 0.39                | *** | 0.62                | 0.06 |
| <b>SCNN1B</b>   | 0.41                | *** | 0.43                | *** | 0.42                 | *** | 0.38                | *** | 0.46                | *** | 0.65                | *    |
| <b>SLC26A3</b>  | 0.27                | *** | 0.09                | *** | 0.28                 | *** | 0.33                | *** | 0.10                | *** | 0.21                | 0.08 |
| <b>SLC30A10</b> | 0.39                | *** | 0.31                | *** | 0.37                 | *** | 0.47                | *** | 0.26                | *** | 0.42                | *    |
| <b>SLC4A4</b>   | 0.37                | *** | 0.05                | *** | 0.35                 | *** | 0.31                | *** | 0.06                | **  | 0.03                | *    |
| <b>SLC7A5</b>   | 3.38                | *** | 5.93                | *** | 3.29                 | *** | 3.59                | *** | 5.72                | *** | 3.51                | 0.14 |
| <b>SPIB</b>     | 0.25                | *** | 0.34                | *** | 0.25                 | *** | 0.36                | *** | 0.35                | *** | 0.61                | *    |
| <b>SPINK5</b>   | 0.38                | *** | 0.40                | *** | 0.37                 | *** | 0.33                | *** | 0.43                | *** | 0.59                | *    |
| <b>SPP1</b>     | 5.55                | *** | 5.47                | *** | 8.67                 | *** | 3.46                | *** | 5.85                | *** | 2.24                | 0.13 |
| <b>SST</b>      | 0.46                | *** | 0.51                | *** | 0.40                 | *** | 0.44                | *** | 0.56                | *** | 0.77                | 0.15 |
| <b>TCN1</b>     | 5.16                | *** | 1.09E+07            | *   | 11.70                | *** | 3.29                | *** | 4.03E+3             | 0.1 | 4.85E+40            | 0.48 |
| <b>THRB</b>     | 0.38                | *** | 0.21                | *** | 0.39                 | *** | 0.31                | *** | 0.25                | *** | 0.27                | *    |
| <b>TRPM6</b>    | 0.30                | *** | 0.25                | *** | 0.32                 | *** | 0.39                | *** | 0.26                | *** | 0.39                | *    |
| <b>ZG16</b>     | 0.33                | *** | 0.22                | *** | 0.26                 | *** | 0.18                | *** | 0.20                | *** | 0.28                | *    |

The p values were from the logistic regression. \* $<0.05$ , \*\* $<0.01$  and \*\*\* $<0.001$

& control the variable of genders with males as the reference group

|| control the variable of races with the European people as the reference group

+ control the variable of the location of tissues, with the samples of proximal position as the reference group

% control the variable of ages with the people of  $\leq 60$  years as the reference group

@ control the variables of gender, races, location of tissues and ages

**Table 10 Multivariate logistic regression of 55 significant genes and clinical variables**

| Gene symbol     | Outcomes (dependent variable) |      |                     |      |                     |      |                     |      |                      |      |                      |      |
|-----------------|-------------------------------|------|---------------------|------|---------------------|------|---------------------|------|----------------------|------|----------------------|------|
|                 | MSI <sup>a</sup>              |      | Stage2 <sup>b</sup> |      | Stage3 <sup>b</sup> |      | Stage4 <sup>b</sup> |      | Grade 2 <sup>c</sup> |      | Grade 3 <sup>c</sup> |      |
|                 | (n=90)                        |      | (n=196)             |      | (n=221)             |      | (n=147)             |      | (n=231)              |      | (n=65)               |      |
|                 | OR                            | p    | OR                  | p    | OR                  | p    | OR                  | p    | OR                   | p    | OR                   | p    |
| <i>ABCG2</i>    | 0.83                          | **   | 1.05                | 0.69 | 1.19                | 0.10 | 1.17                | 0.17 | 3.20                 | 0.09 | 3.70                 | 0.06 |
| <i>AHCYL2</i>   | 1.17                          | *    | 0.91                | 0.39 | 0.91                | 0.40 | 0.89                | 0.32 | 0.83                 | 0.30 | 0.53                 | **   |
| <i>AQP8</i>     | 0.88                          | *    | 1.02                | 0.84 | 1.09                | 0.28 | 0.99                | 0.87 | 1.88                 | 0.27 | 1.66                 | 0.38 |
| <i>BEST2</i>    | 0.78                          | *    | 0.92                | 0.55 | 0.87                | 0.32 | 0.76                | 0.11 | 1.33                 | 0.41 | 1.08                 | 0.84 |
| <i>BTNL3</i>    | 0.62                          | ***  | 0.91                | 0.35 | 0.96                | 0.70 | 0.74                | *    | 1.71                 | *    | 2.17                 | **   |
| <i>C6orf105</i> | 0.93                          | 0.18 | 0.83                | *    | 0.81                | **   | 0.80                | *    | 0.92                 | 0.53 | 0.66                 | *    |
| <i>C9orf125</i> | 1.28                          | *    | 1.10                | 0.47 | 0.89                | 0.37 | 0.99                | 0.96 | 0.87                 | 0.55 | 1.30                 | 0.29 |
| <i>CA1</i>      | 0.74                          | ***  | 1.02                | 0.84 | 0.94                | 0.54 | 0.88                | 0.25 | 1.08                 | 0.65 | 0.67                 | *    |
| <i>CA4</i>      | 0.91                          | *    | 0.99                | 0.92 | 0.98                | 0.78 | 0.91                | 0.12 | 1.25                 | 0.15 | 1.02                 | 0.92 |
| <i>CA7</i>      | 0.49                          | *    | 0.73                | 0.20 | 0.84                | 0.39 | 0.78                | 0.32 | 1.8E+88              | ***  | 1.8E+88              | -    |
| <i>CD177</i>    | 0.99                          | 0.85 | 1.06                | 0.45 | 1.10                | 0.24 | 0.62                | ***  | 1.40                 | 0.21 | 1.45                 | 0.19 |
| <i>CDH3</i>     | 1.28                          | **   | 1.17                | 0.12 | 1.07                | 0.51 | 1.03                | 0.74 | 0.89                 | 0.57 | 0.64                 | *    |
| <i>CHP2</i>     | 0.80                          | ***  | 0.89                | 0.07 | 0.88                | *    | 0.92                | 0.20 | 1.37                 | *    | 1.54                 | **   |
| <i>CHST5</i>    | 1.19                          | **   | 0.85                | 0.07 | 0.82                | *    | 0.60                | ***  | 0.98                 | 0.90 | 1.20                 | 0.33 |
| <i>CLCA1</i>    | 0.96                          | 0.19 | 0.92                | *    | 0.86                | ***  | 0.89                | **   | 0.99                 | 0.87 | 0.93                 | 0.30 |
| <i>CLCA4</i>    | 0.96                          | 0.16 | 1.03                | 0.42 | 0.99                | 0.84 | 0.99                | 0.85 | 1.12                 | 0.22 | 1.01                 | 0.89 |
| <i>CLDN1</i>    | 0.97                          | 0.50 | 1.09                | 0.24 | 0.95                | 0.47 | 1.16                | 0.08 | 1.01                 | 0.91 | 0.81                 | 0.10 |
| <i>CLDN8</i>    | 0.76                          | ***  | 0.97                | 0.59 | 0.99                | 0.83 | 0.88                | 0.10 | 1.37                 | 0.22 | 1.19                 | 0.52 |
| <i>CPM</i>      | 0.54                          | ***  | 1.14                | 0.45 | 1.14                | 0.45 | 1.12                | 0.56 | 1.08                 | 0.81 | 0.39                 | *    |
| <i>CWH43</i>    | 0.72                          | ***  | 0.89                | 0.14 | 0.88                | 0.11 | 0.93                | 0.38 | 1.17                 | 0.40 | 1.39                 | 0.08 |
| <i>DEFA6</i>    | 0.77                          | ***  | 0.97                | 0.49 | 0.85                | ***  | 0.95                | 0.21 | 0.99                 | 0.85 | 1.02                 | 0.76 |
| <i>EDN3</i>     | 0.53                          | ***  | 0.90                | 0.51 | 1.07                | 0.65 | 0.77                | 0.13 | 1.19                 | 0.58 | 1.44                 | 0.26 |
| <i>FAM55D</i>   | 0.71                          | ***  | 0.95                | 0.42 | 0.92                | 0.20 | 0.99                | 0.87 | 1.08                 | 0.52 | 0.88                 | 0.41 |
| <i>FCGBP</i>    | 1.12                          | **   | 0.92                | 0.06 | 0.86                | ***  | 0.86                | ***  | 0.87                 | 0.08 | 0.88                 | 0.15 |
| <i>GALNT6</i>   | 0.71                          | ***  | 1.02                | 0.83 | 1.14                | 0.08 | 1.06                | 0.43 | 0.68                 | **   | 0.44                 | ***  |
| <i>GCG</i>      | 0.80                          | **   | 0.99                | 0.94 | 1.00                | 0.97 | 0.96                | 0.60 | 1.33                 | 0.23 | 1.24                 | 0.37 |
| <i>GUCA2A</i>   | 0.79                          | ***  | 1.00                | 0.96 | 1.04                | 0.59 | 0.96                | 0.60 | 1.34                 | 0.10 | 1.08                 | 0.68 |
| <i>GUCA2B</i>   | 0.87                          | *    | 0.94                | 0.68 | 0.96                | 0.76 | 0.87                | 0.39 | 3.42                 | 0.34 | 2.58                 | 0.47 |
| <i>H3F3A</i>    | 0.18                          | ***  | 0.96                | 0.50 | 1.05                | 0.43 | 1.03                | 0.65 | 1.10                 | 0.38 | 1.28                 | *    |
| <i>HP</i>       | 0.55                          | *    | 0.98                | 0.89 | 1.09                | 0.54 | 1.03                | 0.86 | 1.97                 | 0.18 | 3.70                 | *    |
| <i>IL6R</i>     | 0.66                          | ***  | 1.01                | 0.97 | 0.98                | 0.86 | 1.02                | 0.86 | 1.07                 | 0.80 | 0.92                 | 0.77 |
| <i>KIAA1199</i> | 0.91                          | 0.17 | 1.10                | 0.27 | 1.06                | 0.51 | 0.92                | 0.39 | 0.99                 | 0.95 | 1.34                 | *    |
| <i>KLK11</i>    | 1.26                          | ***  | 1.06                | 0.46 | 1.07                | 0.41 | 0.99                | 0.89 | 0.83                 | 0.10 | 0.80                 | 0.10 |
| <i>MMP7</i>     | 0.84                          | ***  | 1.15                | *    | 1.20                | ***  | 1.12                | *    | 1.07                 | 0.52 | 0.87                 | 0.20 |

| Gene symbol     | Outcomes (dependent variable) |      |                     |      |                     |      |                     |      |                      |      |                      |      |
|-----------------|-------------------------------|------|---------------------|------|---------------------|------|---------------------|------|----------------------|------|----------------------|------|
|                 | MSI <sup>a</sup>              |      | Stage2 <sup>b</sup> |      | Stage3 <sup>b</sup> |      | Stage4 <sup>b</sup> |      | Grade 2 <sup>c</sup> |      | Grade 3 <sup>c</sup> |      |
|                 | (n=90)                        |      | (n=196)             |      | (n=221)             |      | (n=147)             |      | (n=231)              |      | (n=65)               |      |
|                 | OR                            | p    | OR                  | p    | OR                  | p    | OR                  | p    | OR                   | p    | OR                   | p    |
| <i>MS4A12</i>   | 0.87                          | ***  | 1.02                | 0.74 | 1.04                | 0.40 | 0.99                | 0.80 | 1.43                 | *    | 1.33                 | 0.10 |
| <i>MT1M</i>     | 1.09                          | *    | 0.98                | 0.76 | 1.02                | 0.70 | 0.91                | 0.17 | 1.13                 | 0.36 | 0.96                 | 0.77 |
| <i>MUC2</i>     | 1.15                          | ***  | 0.96                | 0.31 | 0.93                | 0.09 | 0.89                | **   | 0.84                 | *    | 0.75                 | **   |
| <i>NFE2L3</i>   | 1.06                          | 0.42 | 0.87                | 0.25 | 0.87                | 0.24 | 0.97                | 0.83 | 0.83                 | 0.40 | 0.62                 | *    |
| <i>NR3C1</i>    | 0.96                          | 0.55 | 1.07                | 0.32 | 1.10                | 0.16 | 1.24                | **   | 0.92                 | 0.50 | 0.70                 | **   |
| <i>NR3C2</i>    | 1.10                          | 0.10 | 0.98                | 0.83 | 0.83                | *    | 0.96                | 0.61 | 1.00                 | 1.00 | 0.98                 | 0.86 |
| <i>NUP153</i>   | 0.89                          | 0.10 | 0.96                | 0.44 | 1.06                | 0.18 | 0.87                | *    | 1.08                 | 0.35 | 1.28                 | **   |
| <i>PYY</i>      | 0.41                          | *    | 1.24                | 0.49 | 1.14                | 0.67 | 1.13                | 0.70 | 1.2E+63              | ***  | 7.0E+62              | -    |
| <i>SCNN1B</i>   | 0.73                          | **   | 1.00                | 0.99 | 1.00                | 0.97 | 0.93                | 0.58 | 109                  | 0.23 | 61                   | 0.29 |
| <i>SLC26A3</i>  | 0.75                          | ***  | 0.98                | 0.78 | 1.03                | 0.63 | 1.03                | 0.69 | 1.30                 | *    | 1.04                 | 0.80 |
| <i>SLC30A10</i> | 0.71                          | *    | 0.69                | 0.13 | 0.64                | 0.09 | 0.93                | 0.69 | 2.2E+96              | ***  | 2.07E+96             | -    |
| <i>SLC4A4</i>   | 0.75                          | **   | 1.09                | 0.48 | 1.08                | 0.53 | 0.72                | *    | 1.19                 | 0.53 | 0.92                 | 0.79 |
| <i>SLC7A5</i>   | 1.22                          | **   | 1.15                | 0.18 | 1.21                | 0.07 | 1.03                | 0.81 | 1.14                 | 0.43 | 1.80                 | **   |
| <i>SPIB</i>     | 0.62                          | **   | 0.83                | 0.53 | 1.18                | 0.50 | 0.88                | 0.68 | 6.5E+05              | 0.20 | 7.1E+05              | 0.20 |
| <i>SPINK5</i>   | 0.89                          | *    | 1.10                | 0.30 | 1.13                | 0.18 | 1.04                | 0.66 | 1.22                 | 0.33 | 1.20                 | 0.40 |
| <i>SPP1</i>     | 1.10                          | 0.11 | 1.38                | ***  | 1.44                | ***  | 1.50                | ***  | 1.04                 | 0.71 | 0.95                 | 0.68 |
| <i>SST</i>      | 0.64                          | **   | 0.87                | 0.32 | 0.83                | 0.18 | 0.90                | 0.44 | 2.88                 | 0.30 | 1.89                 | 0.55 |
| <i>TCN1</i>     | 1.12                          | **   | 1.04                | 0.38 | 0.98                | 0.68 | 0.97                | 0.59 | 0.76                 | ***  | 0.84                 | *    |
| <i>THR3</i>     | 0.55                          | ***  | 1.06                | 0.53 | 1.03                | 0.69 | 1.24                | *    | 1.12                 | 0.52 | 0.74                 | 0.19 |
| <i>TRPM6</i>    | 0.26                          | ***  | 0.89                | 0.39 | 1.01                | 0.93 | 0.70                | *    | 1.68                 | 0.12 | 2.82                 | **   |
| <i>ZG16</i>     | 0.91                          | **   | 0.97                | 0.50 | 0.93                | 0.08 | 0.95                | 0.24 | 1.13                 | 0.16 | 1.00                 | 0.98 |

Dependent variables were clinical variables.

a. Reference group was MSS (n=280).

b. Reference group was Stage1 (n=86).

c. Reference group was Grade1 (n=21).

Table 11 Significant functional pathways in the comparison of colorectal tumors and normal mucosal tissues via the method of Gene Set Enrichment

Analysis(GSEA). **The input variables were the gene expression of 55 genes.**

| MSigDB        | Names of gene sets                           | Enriched in* | Category             | # of genes | NES   | NOM.p.val | FDR.q.val |
|---------------|----------------------------------------------|--------------|----------------------|------------|-------|-----------|-----------|
| <b>C1_ALL</b> | CHR7P14                                      | crc          |                      | 21         | -1.71 | 0         | 0.23      |
|               | CHR7Q32                                      |              |                      | 25         | 1.72  | 0         | 0.22      |
|               | CHR13Q12                                     |              |                      | 45         | 1.69  | 0.02      | 0.22      |
| <b>C2_CP</b>  | HSA04110_CELL_CYCLE                          | crc          | cell cycle           | 103        | -1.83 | 0         | 0.06      |
|               | HSA03020_RNA_POLYMERASE                      |              | transcription        | 18         | -1.86 | 0.01      | 0.07      |
|               | HSA00564_GLYCEROPHOSPHOLIPID_ METABOLISM     | nm           | lipid metabolism     | 55         | 1.79  | 0         | 0.17      |
|               | HSA00565_ETHER_LIPID_METABOLISM              |              |                      | 27         | 1.80  | 0         | 0.20      |
| <b>C5_BP</b>  | CELL_CYCLE_PROCESS                           | crc          | cell cycle           | 169        | 1.81  | 0.01      | 0.05      |
|               | INTERPHASE                                   |              |                      | 63         | 1.85  | 0         | 0.06      |
|               | INTERPHASE_OF_MITOTIC_CELL_CYCLE             |              |                      | 57         | 1.78  | 0         | 0.08      |
|               | DNA_DEPENDENT_DNA_REPLICATION                |              | DNA replication      | 53         | 1.83  | 0         | 0.06      |
|               | DNA_REPLICATION                              |              |                      | 97         | 1.89  | 0         | 0.11      |
|               | AEROBIC_RESPIRATION                          | nm           | metabolic process    | 15         | -1.91 | 0         | 0.03      |
|               | DNA_METABOLIC_PROCESS                        | crc          |                      | 241        | 1.81  | 0         | 0.06      |
|               | FEEDING_BEHAVIOR                             | nm           | response to stimulus | 20         | -2.10 | 0         | 0         |
|               | GLUTAMATE_SIGNALING_PATHWAY                  | crc          | signaling            | 17         | 1.88  | 0         | 0.06      |
| <b>C5_CC</b>  | INTRINSIC_TO_ENDOPLASMIC_RETICULUM_ MEMBRANE | nm           |                      | 20         | -1.83 | 0         | 0.04      |

| MSigDB                                     | Names of gene sets                         | Enriched in*                | Category                     | # of genes                   | NES   | NOM.p.val | FDR.q.val |
|--------------------------------------------|--------------------------------------------|-----------------------------|------------------------------|------------------------------|-------|-----------|-----------|
|                                            | ENDOPLASMIC_RETICULUM_MEMBRANE             |                             |                              | 73                           | -1.70 | 0         | 0.08      |
|                                            | INTEGRAL_TO_ENDOPLASMIC_RETICULUM_MEMBRANE |                             |                              | 20                           | -1.83 | 0         |           |
|                                            | INTRINSIC_TO_ORGANELLE_MEMBRANE            |                             |                              | 44                           | -1.77 | 0         | 0.05      |
|                                            | INTEGRAL_TO_ORGANELLE_MEMBRANE             |                             |                              | 42                           | -1.76 | 0         | 0.05      |
|                                            | PROTEASOME_COMPLEX                         | crc                         |                              | 23                           | 1.71  | 0.02      | 0.11      |
|                                            | RIBONUCLEOPROTEIN_COMPLEX                  |                             |                              | 113                          | 1.71  | 0.01      | 0.14      |
|                                            | NUCLEOLUS                                  |                             |                              | 102                          | 1.80  | 0         | 0.18      |
|                                            | NUCLEAR_CHROMOSOME                         |                             |                              | 45                           | 1.71  | 0         | 0.18      |
|                                            | CONDENSED_CHROMOSOME                       |                             |                              | 29                           | 1.72  | 0         | 0.24      |
|                                            | <i>C5_mf</i>                               | DOUBLE_STRANDED_DNA_BINDING | crc                          | binding→nucleic acid binding | 31    | 1.81      | 0         |
| STRUCTURE_SPECIFIC_DNA_BINDING             |                                            |                             | binding→nucleic acid binding | 53                           | 1.75  | 0.01      | 0.21      |
| CHROMATIN_BINDING                          |                                            |                             | binding→chromatin binding    | 29                           | 1.74  | 0.01      | 0.15      |
| NEUROPEPTIDE_BINDING                       |                                            | nm                          | binding→peptide binding      | 20                           | -2.14 | 0         | 0         |
| CHANNEL_REGULATOR_ACTIVITY                 |                                            |                             | channel regulator activity   | 22                           | -1.79 | 0.01      | 0.02      |
| LIGAND_DEPENDENT_NUCLEAR_RECEPTOR_ACTIVITY |                                            |                             | signal transducer activity   | 24                           | -1.80 | 0         | 0.02      |



| MSigDB | Names of gene sets                                             | Enriched in* | Category             | # of genes | NES   | NOM.p.val | FDR.q.val |
|--------|----------------------------------------------------------------|--------------|----------------------|------------|-------|-----------|-----------|
|        | NEUROPEPTIDE_RECEPTOR_ACTIVITY                                 |              |                      | 20         | -2.14 | 0         | 0         |
|        | MONOVALENT_INORGANIC_CATION_TRANSMEMBRANE_TRANSPORTER_ACTIVITY |              | transporter activity | 32         | -2.03 | 0         | 0         |
|        | HYDROGEN_ION_TRANSMEMBRANE_TRANSPORTER_ACTIVITY                |              |                      | 26         | -1.96 | 0         | 0         |
|        | ANION_CHANNEL_ACTIVITY                                         |              |                      | 17         | -1.97 | 0         | 0.01      |
|        | CHLORIDE_CHANNEL_ACTIVITY                                      |              |                      | 16         | -1.93 | 0         | 0.01      |
|        | SODIUM_CHANNEL_ACTIVITY                                        |              |                      | 15         | -1.89 | 0         | 0.01      |

Normal mucosal tissues (nm), colorectal tumors (crc)
